1 **Title:** Interactions with Commensal and Pathogenic Bacteria Induce HIV-1 Latency in  
2 Macrophages through Altered Transcription Factor Recruitment to the LTR

3

4 **Authors:** Gregory A. Viglianti<sup>1</sup>, Vicente Planelles<sup>2</sup>, Timothy M. Hanley<sup>1,2,#</sup>

5

6 **Affiliations:** <sup>1</sup>Department of Microbiology, Boston University School of Medicine, Boston, MA

7 02118

8 <sup>2</sup>Department of Pathology, University of Utah Health, Salt Lake City, UT 84105

9

10 **Running Title:** Induction of HIV-1 Latency in Macrophages by Bacteria

11

12 #Address correspondence to Timothy M. Hanley, [timothy.hanley@hsc.utah.edu](mailto:timothy.hanley@hsc.utah.edu)

13

14 **ABSTRACT**

15

16 Macrophages are infected by HIV-1 *in vivo* and contribute to both viral spread and  
17 pathogenesis. Recent human and animal studies suggest that HIV-1-infected macrophages  
18 serve as a reservoir that contributes to HIV-1 persistence during anti-retroviral therapy. The  
19 ability of macrophages to serve as persistent viral reservoirs is likely influenced by the local  
20 tissue microenvironment, including interactions with pathogenic and commensal microbes. Here  
21 we show that the sexually transmitted pathogen *Neisseria gonorrhoeae* (GC) and the gut-  
22 associated microbe *Escherichia coli* (*E. coli*), which encode ligands for both Toll-like receptor 2  
23 (TLR2) and TLR4, repressed HIV-1 replication in macrophages and thereby induced a state  
24 reminiscent of viral latency. This repression was mediated by signaling through TLR4 and the  
25 adaptor protein TRIF and was associated with increased production of type I interferons.  
26 Inhibiting TLR4 signaling, blocking type 1 interferon, or knocking-down TRIF reversed LPS- and  
27 GC-mediated repression of HIV-1. Finally, the repression of HIV-1 in macrophages was  
28 associated with the recruitment of interferon regulatory factor 8 (IRF8) to the interferon  
29 stimulated response element (ISRE) downstream of the 5' HIV-1 long terminal repeat (LTR).  
30 Our data indicate that IRF8 is responsible for repression of HIV-1 replication in macrophages in  
31 response to TRIF-dependent signaling during GC and *E. coli* co-infection. These findings  
32 highlight the potential role of macrophages as HIV-1 reservoirs as well as the role of the tissue  
33 microenvironment and co-infections as modulators of HIV-1 persistence.

34

35 **IMPORTANCE** The major barrier toward the eradication of HIV-1 infection is the presence of a  
36 small reservoir of latently infected cells, which include CD4+ T cells and macrophages that  
37 escape immune-mediated clearance and the effects of anti-retroviral therapy. There remain  
38 crucial gaps in our understanding of the molecular mechanisms that lead to transcriptionally  
39 silent or latent HIV-1 infection of macrophages. The significance of our research is in identifying

40 microenvironmental factors, such as commensal and pathogenic microbes, that can contribute  
41 to the establishment and maintenance of latent HIV-1 infection in macrophages. It is hoped that  
42 identifying key processes contributing to HIV-1 persistence in macrophages may ultimately lead  
43 to novel therapeutics to eliminate latent HIV-1 reservoirs *in vivo*.

44

## 45 INTRODUCTION

46

47 Macrophages are among the immune cells located within the gastrointestinal and genitourinary  
48 mucosae thought to play a role in HIV-1 sexual transmission and pathogenesis (1-3). A number  
49 of studies examining either HIV-1 infection of human vaginocervical or gastrointestinal tissue  
50 explants or SIV<sub>mac</sub> infection in rhesus macaque animal models have shown that macrophages  
51 are among the earliest cells infected during mucosal transmission (2, 4, 5). Macrophages can  
52 be productively infected with HIV-1 and are thought to be a source of virus persistence *in vivo*  
53 (6). Given their role in transmission, pathogenesis, and viral persistence, it is important to  
54 understand how the local mucosal microenvironment and cellular signaling pathways modulate  
55 interactions between macrophages and HIV-1.

56

57 Sexually-transmitted infections (STIs) have been shown to be co-factors that enhance HIV-1  
58 transmission (7). *Neisseria gonorrhoeae* (gonococcus, GC) is a non-ulcerative STI that is  
59 thought to augment mucosal transmission of HIV-1 both by inducing inflammation and by  
60 directly activating virus infection and replication (8-13). The role of GC in HIV-1 persistence is  
61 less well understood. Several studies have implicated GC-encoded pathogen-associated  
62 molecular patterns (PAMPs) as mediators of both inflammation and HIV-1 activation in target  
63 cells such as macrophages; however, the interactions between GC and macrophages are  
64 complex. GC encodes PAMPs capable of engaging Toll-like receptors (TLRs), including TLR2,  
65 TLR4, and TLR9 (14, 15). While the effects of co-infection with live GC on HIV-1 replication in

66 macrophages have not been reported, purified lipooligosaccharide (LOS) as well as *Escherichia*  
67 *coli* lipopolysaccharide (LPS) have been shown to repress virus replication through the  
68 production of type 1 interferons (IFNs) (16, 17). In the case of LPS, repression is due to  
69 undefined effects at the level of gene expression. Although it is not entirely clear how TLR2  
70 signaling affects HIV-1 expression in macrophages, studies have shown that purified TLR2  
71 ligands activate virus replication in macrophages (18) and latently-infected T cells (19).

72

73 Here, we demonstrate that co-infection with GC and *E. coli* repress HIV-1 expression in  
74 macrophages. To investigate the underlying mechanism(s) responsible for this repression, we  
75 examined the individual effects of TLR2 and TLR4 signaling on HIV-1 expression in  
76 macrophages. TLR2 signaling activated HIV-1 expression in macrophages, whereas TLR4  
77 signaling repressed virus expression. Importantly, TLR4 signaling overcame the activation  
78 effects of TLR2 signaling in macrophages. The TLR4-mediated repression of HIV-1 in  
79 macrophages co-infected with GC or *E. coli* was dependent on signaling through Toll/IL-1  
80 receptor domain-containing adapter inducing interferon- $\beta$  (TRIF) and required type 1 IFN  
81 production. Finally, we showed that TLR4 signaling leads to the late-phase recruitment of IRF8  
82 to the interferon-stimulated response element (ISRE) downstream of the 5' HIV-1 LTR in  
83 infected macrophages. Taken together, our data suggest TRIF-mediated signaling represses  
84 HIV-1 replication in response to GC or *E. coli* co-infection in an IRF8-dependent manner and  
85 shifts macrophages from a state of robust HIV-1 expression to a state of persistent low-  
86 level/latent infection.

87

## 88 **MATERIALS AND METHODS**

89

90 **Ethics Statement.** This research has been determined to be exempt by the Institutional Review  
91 Board of the Boston University Medical Center since it does not meet the definition of human  
92 subjects research.

93

94 **Cell isolation and culture.** Primary human CD14<sup>+</sup> monocytes were isolated from the  
95 peripheral blood mononuclear cells of healthy donors using anti-CD14 magnetic beads (Miltenyi  
96 Biotec) per the manufacturer's instructions. Primary monocyte-derived macrophages (MDMs)  
97 were generated by culturing CD14<sup>+</sup> monocytes in the presence of 10% human AB serum and  
98 10% FBS for 6 days. Following differentiation, MDMs were cultured in RPMI-1640  
99 supplemented with 10% FBS, 100 U/ml penicillin, 100 µg/ml streptomycin, and 0.29 mg/ml L-  
100 glutamine. The genetic sex of a subset of the donors was determined by PCR amplification of  
101 the SRY gene located on the Y chromosome. PM1 cells were cultured in RPMI-1640  
102 supplemented with 10% FBS, 100 U/ml penicillin, 100 µg/ml streptomycin, and 0.29 mg/ml L-  
103 glutamine. 293T cells were cultured in DMEM supplemented with 10% FBS, 100 U/ml penicillin,  
104 100 µg/ml streptomycin, and 0.29 mg/ml L-glutamine. MAGI-CCR5 cells were cultured in DMEM  
105 supplemented with 10% FBS, 100U/ml penicillin, 100 µg/ml streptomycin, 0.29 mg/ml L-  
106 glutamine, 500 µg/ml G418, 1 µg/ml puromycin, and 0.1 µg/ml hygromycin B. HEK293-  
107 TLR2<sup>CFP</sup>TLR1<sup>YFP</sup> cells and HEK293-TLR4<sup>CFP</sup>/MD-2/CD14 cells were cultured in DMEM  
108 supplemented with 10% FBS, 10 µg/ml ciprofloxacin, 0.29 mg/ml L-glutamine, and 500 µg/ml  
109 G418.

110

111 **Bacterial culture.** *Neisseria gonorrhoea* (GC) strain FA1090B was a generous gift from Dr.  
112 Caroline Genco. GC was cultured from a glycerol stock on GC agar plates supplemented with  
113 IsoVitalex Enrichment (Becton Dickinson) in a humidified 37°C incubator with 5% CO<sub>2</sub>. *E. coli*  
114 strain DH5α was purchased from New England Biolabs and was cultured from a glycerol stock

115 on LB agar plates at 37°C. Where indicated, bacteria were heat inactivated (heat killed) by  
116 incubation at 56°C for 2 hours. Heat inactivation was monitored by culture on GC or LB agar  
117 plates as described above.

118

119 **Flow cytometry.** TLR expression on viable MDMs was assessed eight days after isolation  
120 using antibodies against TLR2 (clone TL2.1) and TLR4 (clone HTA125) (both from eBioscience)  
121 and eFluor 450 fixable viability dye (eBioscience). MDMs were stained in plates, washed with  
122 phosphate-buffered saline (PBS), fixed using BD Cytofix (BD Biosciences), and then detached  
123 after incubation in PBS supplemented with 20 mM EDTA for 1 hour at 4°C. Flow cytometric data  
124 was acquired using a Becton-Dickenson FACScan II or LSRFortessa and data was analyzed  
125 using FlowJo software.

126

127 **TLR ligands, interferons, and chemical inhibitors.** PAM3CSK4, FSL-1, *Salmonella*  
128 *typhimurium* flagellin (FLA-ST), poly I:C, and *E. coli* K12 LPS were obtained from Invivogen.  
129 TLR ligands were reconstituted in endotoxin-free H<sub>2</sub>O. IFN- $\alpha$  and IFN- $\beta$  were purchased from  
130 PBL Interferon Source. B18R was purchased from Abcam. BAY 11-7082, celastrol, U0126,  
131 PD95809, and SB203580 were purchased from Sigma and reconstituted in DMSO. Dynasore  
132 was purchased from Tocris Bioscience and was reconstituted in DMSO.

133

134 **Virus Production.** Single-round replication-defective HIV-1 reporter viruses were generated by  
135 packaging a luciferase expressing reporter virus, Bru $\Delta$ EnvLuc2, or an enhanced green  
136 fluorescent protein expressing reporter virus, Bru $\Delta$ EnvEGFP3, with the envelope glycoproteins  
137 from VSV (VSV-G). In these constructs, reporter gene expression is under the control of the 5'  
138 LTR. Reporter virus stocks were generated by transfecting HEK293T cells using the calcium  
139 phosphate method as described previously (18). Replication competent HIV-1<sub>Ba-L</sub> was generated

140 by infection of PM1 cells as described previously (18). Virus titers were determined using MAGI-  
141 CCR5 cells, and p24<sup>gag</sup> content was determined by ELISA as described previously (18).

142

143 **Virus infections.** To assess viral replication, macrophages ( $2.5 \times 10^5$  cells/well in 24-well  
144 plates) were incubated with VSV-G-pseudotyped HIV-luciferase reporter virus at a multiplicity of  
145 infection (MOI) of 0.1 for 4 hours at 37°C. Cells were washed four to five times with PBS to  
146 remove unbound virus, and cultured in growth medium. Following 48 hours of culture, cells were  
147 treated with TLR ligands or vehicle, as indicated in the text and figure legends. After 18 hours,  
148 the cells were washed twice with PBS and lysed in PBS/0.02% Triton X-100. Luciferase activity  
149 was measured using BrightGlo luciferase reagent (Promega) and a MSII luminometer.

150

151 **HIV-1 transcription.** Total cytoplasmic RNA was isolated from MDMs using the RNeasy Mini kit  
152 (Qiagen). RNA (100 ng) was analyzed by reverse transcription-PCR (RT-PCR) using the  
153 OneStep RT-PCR kit (Qiagen). RNA was reverse transcribed and amplified in a total volume of  
154 50  $\mu$ l containing 2.5 mM MgCl<sub>2</sub>, 400  $\mu$ M concentrations of each deoxynucleoside triphosphate,  
155 10 U of RNasin RNase inhibitor (Promega), 5  $\mu$ Ci of  $\alpha$ -<sup>32</sup>P dATP, and 0.6  $\mu$ M HIV-1 specific  
156 primers. RNA samples were reverse transcribed for 30 minutes at 50°C. After an initial  
157 denaturing step at 95°C for 15 minutes, cDNA products were amplified for 25 cycles each  
158 consisting of a 30-second denaturing step at 94°C, a 45-second annealing step at 65°C, and a  
159 one-minute extension step at 72°C. The amplification concluded with a 10-minute extension  
160 step at 72°C. Samples were resolved on 5% nondenaturing polyacrylamide gels, visualized by  
161 autoradiography, and quantified in a Molecular Dynamics PhosphorImager SI using  
162 ImageQuant software. Alternatively, HIV-1 RNA was analyzed using the QuantiTect SYBR  
163 Green RT-PCR kit (Qiagen) in a LightCycler 480 (Roche). The HIV-1 primers were specific for  
164 the R and U5 regions of the LTR and amplify both spliced mRNAs and genomic RNA. The HIV-  
165 1 primers were sense primer 5'-GGCTAACTAGGGAACCCACTGC-3' and antisense primer 5'-

166 CTGCTAGAGATTTTCCACACTGAC-3').  $\alpha$ -tubulin primers were: sense primer 5'  
167 CACCCGTCTTCAGGGCTTCTTGGTTT-3' and antisense primer, 5'  
168 CATTTCACCATCTGGTTGGCTGGCTC-3'. RNA standards corresponding to 500, 50, and 5 ng  
169 of RNA from PAM3CSK4-activated MDMs were included in each experiment to ensure that all  
170 amplifications were within the linear range of the assay.

171

172 **HIV-1 RNA stability assays.** MDMs ( $2 \times 10^6$  cells/well in 6-well plates) were incubated with  
173 VSV-G-pseudotyped HIV-luciferase reporter virus at an MOI of 0.1 for 4 h at 37°C. Cells were  
174 washed four to five times with PBS to remove unbound virus and cultured in growth medium.  
175 Following 48 h of culture, cells were treated with TLR ligands (PAM3CSK4 or LPS at 100 ng/ml)  
176 or vehicle for 4 hours. Actinomycin D (10  $\mu$ g/ml) was then added to cells to block *de novo* RNA  
177 synthesis, and total cytoplasmic RNA was isolated at given times as described in the figure  
178 legends. Viral RNA was analyzed using the QuantiTect SYBR Green RT-PCR kit (Qiagen) in a  
179 LightCycler 480 (Roche) with primers specific for the R and U5 regions of the LTR as described  
180 above.

181

182 **Cytokine release assays.** MDMs ( $2.5 \times 10^5$  cells/well) were treated with PAM3CSK4 (100  
183 ng/ml), LPS (100 ng/ml), or GC (MOI of 10) for 24 hours. Cell-free culture supernatants were  
184 collected and analyzed for TNF- $\alpha$  (eBioscience) or IFN- $\beta$  (PBL Interferon Source) release by  
185 commercially-available ELISA following the manufacturer's instructions.

186

187 **Chromatin immunoprecipitation assays.**  $1.2 \times 10^7$  MDMs were incubated with VSV-G-  
188 pseudotyped HIV-EGFP reporter virus at an MOI of 2 for four hours at 37°C. Cells were washed  
189 four to five times with PBS to remove unbound virus and cultured in growth medium. Following  
190 48 hours of culture, MDMs were treated with TLR ligands for various times as described in the



191 text. Cells were then fixed in 1% formaldehyde for 10 minutes at room temperature, quenched  
192 with 125 mM glycine, and lysed in SDS lysis buffer (1% SDS, 10 mM EDTA, 50 mM Tris pH 8.1,  
193 1 mM PMSF, 1  $\mu$ g/ml aprotinin, 1  $\mu$ g/ml pepstatin A). Cellular lysates were sonicated using a  
194 cup horn (550 Sonic Dismembrator, Fisher Scientific) at a power setting of 5 with twenty-five 20-  
195 second pulses on ice, which fragmented the chromatin to an average length of approximately  
196 1000 bp. Samples were diluted and immunoprecipitated with antibodies against NF- $\kappa$ B p65,  
197 IRF1, IRF2, IRF4, IRF8, rabbit IgG, or goat IgG (all from Santa Cruz Biotechnology). Purified  
198 DNA samples from both ChIPs and input controls were resuspended in distilled H<sub>2</sub>O and  
199 analyzed by semi-quantitative PCR. PCR reactions contained 10 mM Tris-HCl pH 8.3, 50 mM  
200 KCl, 1.5 mM MgCl<sub>2</sub>, 100 pmol of each primer, 200  $\mu$ M each dATP, dGTP, dCTP, and dTTP,  
201 5 $\mu$ Ci  $\alpha$ <sup>32</sup>P-dATP, and 2.5 units of Amplitaq Gold (Applied Biosystems) in a 50- $\mu$ l reaction  
202 volume. Following an initial denaturation step at 95°C for 15 minutes, DNAs were amplified for  
203 30 cycles, each consisting of a 30-second denaturing step at 94°C, a 45-second annealing step  
204 at 65°C, and a one-minute extension step at 72°C. Samples were electrophoresed on 5% non-  
205 denaturing polyacrylamide gels, visualized by autoradiography, and quantified using a Molecular  
206 Dynamics PhosphorImager SI using ImageQuant software. Alternatively, purified DNA from  
207 ChIPs and input controls were analyzed using the PowerUp SYBR Green Master Mix (Applied  
208 Biosystems) in a LightCycler 480 (Roche). Primers used to amplify specifically the HIV-1 5' LTR  
209 and GLS were 5'- TGGAAGGGCTAATTTACTCCC -3' (sense) and 5'-  
210 CATCTCTCTCCTTCTAGCCTC -3' (antisense). Control amplifications of a serial dilution of  
211 purified genomic DNA from latently infected U1 cells were performed with each primer set to  
212 ensure that all amplifications were within the linear range of the reaction. To calculate the  
213 relative levels of association with the LTR, PhosphorImager data of the PCR products obtained  
214 for immunoprecipitated chromatin samples were normalized against the PCR products obtained

215 for input DNA (% Input). Values were normalized across donors and expressed as relative  
216 binding.

217

218 **LTR mutant construction.** The reported plasmid pLTR(Sp1)-luciferase was generated by PCR  
219 amplification of pNL4-3 using the sense primer 5'-  
220 CGGGGTACCCCGTGAAGGGCTAATTTGGTCCC- 3' and the antisense primers 5'-  
221 CCGCTCGAGCGGCATCTCTCTCCTTCTAGCCTC-3', digestion with KpnI and XhoI, and  
222 ligation into KpnI/XhoI-digested pGL3-Basic (Promega). Mutations to the NF- $\kappa$ B and IRF binding  
223 sites in pLTR(Sp1)-luciferase were generated using the QuickChange IIXL site-directed  
224 mutagenesis kit (Stratagene). Primers used for site-directed mutagenesis are listed in Table 1.  
225 The -158 LTR-luciferase construct was generated by deleting the LTR sequence upstream of  
226 position -158 (relative to the start site of transcription) of pNL4-3, which includes the AP-1  
227 binding sites located in the U3 portion of the 5' LTR, digestion of the resulting fragment with  
228 KpnI and XhoI, and ligation into KpnI/XhoI-digested pGL3-Basic (Promega).

229

230 **shRNA knock-down of MyD88, TRIF, and IRF8.** MDMs ( $1.2 \times 10^7$ ) were transfected with  
231 plasmids that encoded either a mixture of three to five shRNAs directed against MyD88, a  
232 mixture of three to five shRNAs directed against TRIF, or a mixture of three to five control  
233 shRNAs (Invivogen) and a blasticidin-resistance gene using Oligofectamine (Invitrogen) per the  
234 manufacturer's instructions. Transfected cells were selected by culture in the presence of  
235 blasticidin for 48 hours, and either used in HIV-1 replication assays or lysed for immunoblot  
236 analysis to measure MyD88 and TRIF expression using a rabbit monoclonal antibody to MyD88  
237 (Cell Signaling Technology), a rabbit polyclonal antibody to TRIF (Cell Signaling Technology), or  
238 a mouse monoclonal antibody to  $\beta$ -actin (Sigma). Similarly, MDMs were transfected with  
239 plasmids that encoded either a mixture of three to five shRNAs directed against IRF8 (Sigma) or

240 a mixture of control shRNAs (Sigma) and a puromycin-resistance gene using Oligofectamine  
241 (Invitrogen) per the manufacturer's instructions. Transfected cells were selected by culture in  
242 the presence of puromycin for 48 hours and either used in HIV-1 replication assays or lysed for  
243 immunoblot analysis to measure IRF8 expression using a rabbit monoclonal antibody (Cell  
244 Signaling Technology).

245

246 **Overexpression of IRF8.** MDMs ( $1.2 \times 10^7$ ) were transfected with a plasmid that encoded IRF8  
247 (Origene) and a neomycin-resistance gene using Oligofectamine (Invitrogen) per the  
248 manufacturer's instructions. Transfected cells were selected by culture in the presence of  
249 neomycin for 48 hours and then used for HIV-1 replication assays or lysed for immunoblot  
250 analysis to measure IRF8 expression using a rabbit monoclonal antibody (Cell Signaling  
251 Technology).

252

253 **Endocytosis/phagocytosis assays.** MDMs ( $5 \times 10^5$ /well) were treated with Dynasore (80  $\mu$ M)  
254 or DMSO and then incubated with pHrodo Green *E. coli* particles (Thermo Fisher) at 1 mg/ml for  
255 2 hours at 37°C. The MDMs were then washed three times with PBS, incubated with eFluor 450  
256 fixable viability dye (eBioscience) for 15 minutes at 4°C, and analyzed by flow cytometry. Flow  
257 cytometric data was acquired using an Becton-Dickenson LSRFortessa, and data was analyzed  
258 using FlowJo software.

259

260 **Statistical analysis.** Comparison between experimental samples was performed with a paired  
261 one-tailed t-test with  $p < 0.5$  denoting significant differences. Experiments were performed in  
262 triplicate using cells from a minimum of four independent donors (unless otherwise indicated) to  
263 control for interdonor variability.

264

265 **RESULTS**

266 **HIV-1 gene expression in MDMs is enhanced or repressed in a TLR-specific manner.** To  
267 determine how purified TLR ligands affected HIV-1 gene expression, MDMs were infected with  
268 a single-round infectious HIV-1 reporter virus, and then treated with ligands for TLR2, TLR3,  
269 TLR4, or TLR5. Ligands that activated TLR2 or TLR5 enhanced HIV-1 replication, whereas  
270 ligands for TLR3 or TLR4 repressed HIV-1 expression (Figure 1A). The effects of TLR ligands  
271 on HIV-1 replication occurred at the level of transcription, as treatment with the TLR2/1 ligand  
272 PAM3CSK4 led to an increase in HIV-1 mRNA accumulation, whereas treatment with the TLR4  
273 ligand LPS led to a decrease in HIV-1 transcript levels (Figure 1C-1D). TLR treatment had no  
274 effect of viral RNA stability, as viral RNA from LPS-treated MDMs had a similar decay rate to  
275 that from untreated MDMs (Figure 1E). Recent studies have demonstrated that myeloid cells  
276 from males and females have different susceptibilities to HIV-1 infection, largely due to  
277 differential levels of innate immune responses and steroid hormones (20-22). We therefore  
278 sought to determine whether there was a sex-based difference in the response to TLR ligand  
279 treatment in MDMs. We found that TLR stimulation had similar effects on HIV-1 expression in  
280 MDMs from both male and female donors (Supplemental Figure 1). These results indicate that  
281 MyD88-dependent signaling enhances HIV-1 transcription whereas TRIF-dependent signaling  
282 inhibits HIV-1 transcription in MDMs.

283

284 MyD88-dependent TLR signaling leads to the activation of both NF- $\kappa$ B and AP-1 transcription  
285 factors, among others (23). The HIV-1 LTR contains binding sites for both NF- $\kappa$ B and AP-1. The  
286 two NF- $\kappa$ B sites are thought to be essential for HIV-1 transcription (24, 25), whereas the AP-1  
287 sites, while not essential, are thought to enhance HIV-1 transcription (26, 27). Previous studies  
288 demonstrated that treatment of HIV-infected MDMs with the TLR2/TLR1 ligand PAM3CSK4 led  
289 to an increased association of the p65 subunit of NF- $\kappa$ B and the c-fos subunit of AP-1 with the  
290 5' LTR which, in turn, correlated with increased virus replication (18); however, the contributions

291 made by each pathway to TLR2-mediated activation have not been previously characterized.  
292 To determine the roles of NF- $\kappa$ B and AP-1 in TLR2-activated HIV replication in MDMs, HIV-1-  
293 infected cells were treated with either BAY 11-7082, an inhibitor of I $\kappa$ B kinase (28), celastrol, a  
294 small molecule inhibitor of the I $\kappa$ B kinase complex (29), or inhibitors that disrupt AP-1 signaling.  
295 As shown in Supplemental figure 2, BAY 11-7082 and celastrol treatment completely ablated  
296 TLR2/1-enhanced HIV-1 expression. Similarly, the use of an LTR-based reporter construct with  
297 mutations in the NF- $\kappa$ B binding sites did not result in increased gene expression in response to  
298 TLR2 signaling (Supplemental Figure 2C). Treatment of HIV-infected macrophages with  
299 inhibitors of kinases upstream of AP-1 activation, such as MEK1/2 (U0126, PD98509), and p38  
300 (SB203580), resulted in modest, but reproducible, decreases in TLR2-mediated activation of  
301 HIV-1 (Supplemental Figure 2D). Similarly, LTR reporter constructs lacking AP-1 binding sites  
302 were activated in response to TLR2 signaling at levels similar to that of the WT construct, further  
303 demonstrating the non-essential role of AP-1 in TLR2-mediated HIV-1 activation (Supplemental  
304 Figure 2E). Although the regulation of HIV-1 transcription through multiple transcription factor  
305 binding sites in and adjacent to the 5' LTR is complex, these data suggest that, in MDMs, TLR2-  
306 activated HIV-1 expression is mediated primarily through NF- $\kappa$ B with a minor contribution from  
307 AP-1 signaling.

308

309 **Co-infection with *Neisseria gonorrhoeae* or *Escherichia coli* represses HIV-1 replication**  
310 **in MDMs.** Our preliminary studies using purified TLR ligands in isolation suggested that different  
311 TLR signaling cascades had diverse effects on HIV-1 replication. Since most pathogens encode  
312 multiple TLR ligands, we sought to determine the effects of intact pathogens on HIV-1  
313 replication. We incubated HIV-infected MDMs with *N. gonorrhoeae* (GC), which expresses  
314 ligands for TLR2, TLR4, and TLR9. We found that increasing amounts of GC led to a dose-  
315 dependent decrease in HIV-1 replication in MDMs (Figure 1F). Bacterial replication was not

316 required for these effects, as heat-killed GC led to repression of HIV-1 replication in MDMs  
317 (Supplemental Figure 3A). GC-mediated repression occurred at the level of viral transcription  
318 (Figure 1G) and did not decrease viral RNA stability (Supplemental Figure 3B). Similar to what  
319 we observed with purified LPS, the biological sex of the donors had no effect on GC- or *E. coli*-  
320 mediated HIV-1 repression in MDMs (Supplemental Figure 3C). In addition, repression of HIV-1  
321 replication is not specific for GC, but may be a generalized response to Gram-negative bacteria,  
322 as co-infection with *E. coli* also repressed HIV-1 replication in MDMs in a manner similar to GC  
323 (Figure 1H). Despite the presence of both activating (TLR2) and repressing (TLR4) TLR ligands,  
324 both GC and *E. coli* mediated repression of HIV-1 replication in macrophages. This finding  
325 raised several possibilities: 1) the dominance of TLR4 signaling over TLR2 signaling in MDMs;  
326 2) different expression levels of TLR2, TLR4, and TLR4-associated molecules such as CD14  
327 and MD-2 on MDMs; 3) different cytokine profiles produced in response to GC or *E. coli*; and/or  
328 4) variable expression of signaling molecules downstream of TLRs. These scenarios were  
329 further explored.

330

331 **TLR4 signaling is dominant in MDMs.** To determine whether certain TLR pathways are  
332 dominant in MDMs, we performed co-treatments of HIV-infected MDMs with the TLR2 ligand  
333 PAM3CSK4 and the TLR4 ligand LPS. We found that increasing the concentration of LPS  
334 against a fixed concentration of PAM3CSK4 led to a reversal of TLR2-mediated activation of  
335 HIV-1 and, eventually, to repression of HIV-1 replication (Figure 2A). Conversely, increasing the  
336 concentration of PAM3CSK4 against a fixed concentration of LPS did not reverse LPS-mediated  
337 repression of HIV-1 (Figure 2A). Flow cytometry was used to determine that the different  
338 responses of MDMs were likely not due to receptor expression, as MDMs express both TLR2  
339 and TLR4 (Figure 2B-C). In addition, MDMs produced both TNF- $\alpha$  and IFN- $\beta$  in response to  
340 LPS treatment, GC co-infection, and *E. coli* co-infection. Whereas treatment of MDMs with LPS  
341 resulted in a similar cytokine profile to that of co-infection, treatment of MDMs with the TLR-

342 ligand PAM3CSK4 resulted in the production of TNF- $\alpha$ , but not appreciable levels of IFN-  $\beta$   
343 (Figure 2D-E). Taken together, our data suggest that TLR4 signaling, which negatively regulates  
344 LTR-driven gene expression, is dominant in MDMs.

345

346 **LPS- and GC-mediated repression of HIV-1 in MDMs is dependent on TRIF-mediated type**

347 **I IFN production.** Since LPS and GC both induce type I IFN production, whereas the TLR2

348 ligand PAM3CSK4 does not, we wished to determine whether GC-stimulated production of IFN-

349  $\alpha/\beta$  contributes to repression of HIV-1 in MDMs. We found that treatment of HIV-infected MDMs

350 with the vaccinia virus-encoded soluble type I IFN receptor B18R reversed GC-mediated

351 inhibition of HIV-1 replication, suggesting that TLR4-mediated IFN production is required for

352 HIV-1 repression by GC (Figure 3A). Since both purified TLR4 ligands and GC, which encodes

353 ligands for TLR2, TLR4, and TLR9, repress HIV-1 replication in MDMs, we predicted that

354 downstream effector molecules of TLR4 signaling would contribute to the repression of HIV-1

355 replication in MDMs. First, we confirmed that TLR4 signaling was responsible for GC-mediated

356 HIV-1 repression in MDMs. Treatment with the TLR4-specific inhibitor TAK242 reversed the

357 LPS- and GC-dependent repression of HIV-1 in MDMs (Figure 3B). Treatment with TAK242 had

358 no effect on TLR2-mediated activation of HIV-1 replication in MDMs, consistent with reports that

359 TAK242 is specific for TLR4 (30).

360

361 It has been shown that TLR4, which can utilize both MyD88 and TRIF adaptor proteins, initiates

362 different signaling pathways dependent upon its cellular location. Cell-surface TLR4

363 engagement leads to MyD88-dependent signaling, whereas endosomal TLR4 engagement

364 leads to TRIF-dependent signaling (31). To examine whether TRIF-dependent signaling is

365 responsible for HIV-1 repression, we blocked dynamin-dependent endocytosis of TLR4 with

366 Dynasore, which prevents TRIF-dependent signaling while leaving MyD88-dependent signaling

367 intact. As shown, blocking endocytosis-mediated TLR4 internalization (Supplemental figure 4)  
368 reversed GC-mediated repression of HIV-1 in MDMs (Figure 3C). Given the ability of GC to  
369 signal through both TLR2-MyD88 and TLR4-TRIF, one might expect the inhibition of type I IFN  
370 signaling by B18R or the inhibition of endocytosis by Dynasore to lead to augmented viral gene  
371 expression through intact MyD88 signaling. However, we did not observe this, likely due to  
372 incomplete inhibition of either IFN signaling or endocytosis.

373

374 To confirm the role of MyD88 in TLR2-mediated HIV-1 activation and TRIF in TLR4-mediated  
375 HIV-1 repression, we used shRNAs to knock down the two molecules in HIV-infected MDMs  
376 (Figure 3D). Knock-down of MyD88 led to a loss of TLR2-mediated HIV-1 activation, but had no  
377 effect on LPS or GC-mediated HIV-1 repression (Figure 3E). In contrast, knock-down of TRIF  
378 had no effect on TLR2-mediated HIV-1 activation, but reversed LPS- and GC-mediated  
379 repression of HIV-1 replication (Figure 3E). Knock-down of either MyD88 or TRIF had no effect  
380 on the activation of HIV-1 by the phorbol ester PMA, which signals directly through protein  
381 kinase C, independently of TLRs (Figure 3E). These data suggest that the TLR4-TRIF-type I  
382 IFN axis in MDMs leads to GC- and *E. coli*-mediated repression of HIV-1 replication.

383

384 **TLR4 signaling leads to differential IRF recruitment to the HIV-1 LTR.** Since type I IFN  
385 production is critical for GC- and *E. coli*-mediated HIV-1 repression in MDMs, we examined the  
386 role of interferon-stimulated genes (ISGs) in HIV-1 regulation. Previous studies have shown that  
387 ISGs are temporally regulated in macrophages in response to innate immune sensors and type I  
388 IFN signaling (32, 33). To determine whether the repressive effects of LPS were due to early or  
389 late phase ISGs, HIV-1-infected MDMs were treated with the TLR2 ligand PAM3CSK4 or the  
390 TLR4 ligand LPS and total cytoplasmic RNA was extracted at various times post treatment.  
391 Treatment of HIV-infected MDMs with the TLR2 ligand PAM3CSK led to a continuous increase  
392 in HIV-1 RNA levels (Figure 4A). In contrast, treatment of HIV-infected MDMs with the TLR4



393 ligand LPS led to an initial short-lived increase in HIV-1 RNA levels; however, levels steadily  
394 declined thereafter (Figure 4A), indicating that HIV-1 transcription displays a biphasic response  
395 to TLR4 stimulation in MDMs. This suggests that late-phase proteins induced by type I IFNs are  
396 responsible for TLR4-mediated decreases in HIV-1 transcription. It is known that HIV-1 contains  
397 an interferon-stimulated response element (ISRE) in the Gag-leader sequence (GLS),  
398 immediately downstream from the 5' LTR. Because type I IFN is required for LPS- and GC-  
399 mediated repression of HIV-1 in MDMs, we assessed the role of the ISRE in this process using  
400 transient transfection assays with mutated LTR-reporter constructs in HEK293 cells expressing  
401 TLR4, MD-2, and CD14. We found that LPS treatment repressed LTR-driven reporter-gene  
402 expression in cells expressing WT ISRE elements, but not in cells transfected with an LTR-  
403 luciferase construct containing a mutated ISRE (Supplemental Figure 5). This suggests that  
404 transcription factor engagement of the ISRE governs TLR4-mediated HIV-1 repression.

405  
406 Previous studies have shown that IRF1 and IRF2 both bind to this ISRE *in vitro* and that IRF1  
407 and IRF2 expression are associated with enhanced HIV-1 transcription (34). Two other IRFs,  
408 IRF4 and IRF8, are also expressed in macrophages (35) and have been shown to increase in  
409 levels in response to type I IFN signaling and other signals (36, 37). Interestingly, IRF8 has  
410 been implicated in maintaining HIV-1 latency in infected monocytic cell lines (34, 38, 39), and  
411 IRF4 has been implicated in negative regulation of TLR signaling (40). We therefore  
412 investigated whether various IRFs are recruited to the HIV-1 ISRE in response to LPS and GC  
413 treatment in MDMs. Using chromatin immunoprecipitation analysis, we found that IRF1, IRF2,  
414 IRF4, and IRF8 all are able to associate with the 5' LTR and GLS containing the ISRE in HIV-  
415 infected MDMs (Figure 4C-D). Early after treatment with LPS, the levels of IRF1 associated with  
416 this region of the viral promoter increased, whereas the levels of IRF2 and IRF4 decreased. By  
417 24h post-treatment with LPS, the levels of IRF4 and IRF8 associated with this region increased.  
418 Of particular note, the levels of IRF8 recruitment increased well above those seen in

419 unstimulated MDMs (Figure 4C). A similar pattern of IRF recruitment to the 5' LTR and GLS  
420 occurred in GC-treated MDMs (4D), suggesting that repression of HIV-1 transcription in  
421 response to LPS and GC treatment is due to enhanced IRF8 recruitment to the 5' LTR and  
422 GLS. To confirm the central role of IRF8 in TLR4-mediated repression of HIV-1 expression in  
423 MDMs, we used shRNA to knockdown IRF8 expression in MDMs (Figure 4E). Reducing IRF8  
424 expression reversed TLR4-mediated HIV-1 repression in response to treatment with LPS or GC.  
425 Knockdown of IRF8 led to activation of HIV-1 expression in cells treated with a combination of  
426 PAM3CSK4 and LPS or GC, similar to that seen with treatment with PAM3CSK4 alone (Figure  
427 4F). In contrast, overexpression of IRF8 in MDMs led to decreased HIV-1 expression in  
428 untreated MDMs and reversed the activation of HIV-1 expression in PAM3CSK4-treated MDMs,  
429 but had no effect on LPS-mediated repression in MDMs (Figure 4G-H). There was a small, but  
430 significant, enhancement of HIV-1 repression in MDMs treated with a combination of  
431 PAM3CSK4 and LPS or with GC.

432

433 Taken together, these data suggest that both LPS and GC activate TLR4-mediated TRIF  
434 signaling in MDMs, resulting in the production of type I IFNs. In turn, IFNs work in an autocrine  
435 or paracrine fashion to induce the expression of IRF8, which then binds to the ISRE present in  
436 the GLS of HIV-1 to repress viral transcription (Figure 6).

437

#### 438 **LPS and GC-treatment induces persistent low-level/latent HIV-1 infection in MDMs.**

439 Recent studies in animals and human tissues demonstrate that HIV-1 can form persistent low-  
440 level or latent infections in macrophages (41-44). Our data suggest that engagement of the  
441 TLR4-TRIF-type I IFN axis in macrophages can repress virus replication and we wished to  
442 determine whether signaling through this axis could contribute to the establishment of persistent  
443 low-level or latent HIV-1 infection in macrophages. To this end, HIV-1-infected MDMs were  
444 treated a single time with the TLR2 ligand PAM3CSK4, the TLR4 ligand LPS, heat-killed GC,

445 IFN- $\alpha$ , or IFN- $\beta$  at day 3 post-infection. As shown in Figure 5, while there was a range of virus  
446 replication in the various donors, we found that treatment with a single dose of LPS, heat-killed  
447 GC, IFN- $\alpha$ , or IFN- $\beta$  consistently led to a prominent, sustained decrease in HIV-1 replication in  
448 MDMs, whereas treatment with PAM3CSK4 led to a transient increase in HIV-1 replication  
449 followed by a slight decrease in replication. These data suggest that engagement of the TLR4-  
450 TRIF-type I IFN axis can promote low-level persistent/latent HIV-1 infection in MDMs.

451

## 452 **DISCUSSION**

453

454 In these studies, we provide evidence that the interaction between commensal and pathogenic  
455 bacteria can repress HIV-1 replication in macrophages by altering the recruitment of  
456 transcription factors to the HIV-1 GLS, thereby inducing a state of proviral latency. We further  
457 demonstrate that TLR2 ligands trigger MyD88-mediated signaling that increases virus  
458 expression via the activation of NF- $\kappa$ B, whereas TLR4 ligands trigger TRIF-dependent  
459 production of type I IFNs. Type I IFN signaling, in turn, is associated with the recruitment of  
460 IRF8 to the ISRE located in the GLS and a shift to low-level or latent HIV-1 infection.

461

462 A number of studies have shown that IRFs play an important role in the regulation of HIV-1  
463 replication. There is an ISRE located downstream from the 5' LTR in the GLS that is essential  
464 for efficient viral replication (26, 45). This ISRE is typically bound by IRF1 and/or IRF2, leading  
465 to activation of virus transcription (34, 46) through the recruitment of transcriptional co-  
466 activators, such as the histone acetyl transferase (HAT) p300/CBP (47). IRF1 and IRF2 are  
467 ubiquitously expressed in cells, though they can be upregulated by type I IFNs (36) and, in the  
468 case of IRF1, by TLR signaling (48, 49) and HIV-1 infection (45, 50), illustrating how HIV-1 can  
469 co-opt the antiviral IFN response to augment its own replication. Once associated with the

470 ISRE, IRF1 can cooperatively bind to both NF- $\kappa$ B at the HIV-1 LTR and the viral transactivator  
471 Tat at the HIV-1 TAR loop to augment viral transcription/elongation (34, 51). Our studies  
472 demonstrate that both IRF1 and IRF2 associate with the HIV-1 ISRE in unstimulated MDMs  
473 (Fig. 4). Upon stimulation with TLR4 ligands, IRF1 recruitment to the HIV-1 ISRE is enhanced  
474 (Fig. 4), consistent with the prevailing theory that TLR-MyD88 signaling can activate IRF1 (52).  
475 This is accompanied by a concomitant decrease of IRF2 binding. These data suggest that IRF1  
476 binding to the ISRE as either monomers or homodimers activates HIV-1 expression, whereas  
477 IRF2 binding to the ISRE as monomers, homodimers, or heterodimers with IRF1 represses HIV-  
478 1 expression. Unfortunately, ChIP analysis of HIV-infected MDMs using current tools does not  
479 permit differentiating between the association of various homodimers and heterodimers with the  
480 ISRE at a population level.

481

482 We demonstrate that at late time points after TLR4 engagement, IRF8 is recruited to the GLS  
483 downstream from the 5' LTR (Figure 4), and that this is associated with decreased HIV-1  
484 transcription (Figure 1). Macrophages express high basal levels of IRF8, although its expression  
485 can be further enhanced in response to type I IFNs (36, 37) or TLR signaling (53, 54). IRF8 has  
486 been shown to bind to IRF1, in addition to other transcription factors, and to serve as either a  
487 transcriptional activator or a transcriptional inhibitor of other genes in a context-dependent  
488 manner (55-57). Previous studies have shown that IRF8 can repress HIV-1 expression (34, 38,  
489 39). In fact, the interaction between IRF8 and IRF1 has been shown to repress HIV-1  
490 transcription in Jurkat cells (34). This may be due to IRF8-mediated disruption of the IRF1-Tat  
491 interaction and/or the IRF1-NF- $\kappa$ B interaction (51) that increase viral replication. Based on our  
492 data, we propose that changes in the IRF binding pattern to the ISRE in response to TLR  
493 signaling have profound effects on HIV-1 replication. In unstimulated HIV-infected  
494 macrophages, the ISRE is most likely occupied by IRF1/IRF2 heterodimers that allow for a low-

495 level of virus replication (Figure 6A). Early after stimulation of TLR4 with LPS, there is a switch  
496 to IRF1 homodimers present at the ISRE that allow for high levels of virus replication due to  
497 cooperative binding between IRF1, NF- $\kappa$ B, and HIV-1 Tat. (Figure 6B). At late time points after  
498 TLR4 stimulation with LPS or GC, during the IFN feedback phase of the response, the ISRE is  
499 occupied by IRF1/IRF8 heterodimers (Figure 6C). These IRF1/IRF8 heterodimers likely block  
500 the cooperative interaction(s) between IRF1, NF- $\kappa$ B, and Tat, thereby repressing HIV-1  
501 replication. Although we also demonstrate that IRF4 is recruited transiently to the HIV-1 ISRE  
502 following treatment with LPS, the biological significance of this finding is uncertain. Prior studies  
503 have provided evidence for an LPS/TLR4-mediated repression of HIV-1 expression through the  
504 induction of type I IFNs and other mechanisms (16, 17, 58-62). Our data extend these findings  
505 and demonstrate that LPS treatment, as well as infection with the sexually transmitted pathogen  
506 GC or the gut-associated microbe *E. coli*, represses HIV-1 expression in MDMs through the  
507 TLR4-mediated, TRIF-dependent production of type I IFNs and the subsequent recruitment of  
508 IRF8 to the HIV-1 ISRE.

509

510 We have demonstrated that MyD88-dependent signaling activates HIV-1 expression in MDMs  
511 by activating NF- $\kappa$ B, whereas TRIF-dependent signaling represses HIV-1 expression in these  
512 cell types through the type I IFN-mediated recruitment of IRF8 to the HIV-1 ISRE. We have also  
513 shown that TLR4-mediated, TRIF-dependent signaling is dominant in MDMs, both in the context  
514 of treatment with purified TLR ligands as well as infection with the sexually transmitted pathogen  
515 GC or the gut-associated microbe *E. coli*. Co-infection of virus-infected MDMs by pathogens  
516 that express TLR4 ligands decreases HIV-1 replication through the recruitment of IRF8 to the  
517 HIV-1 ISRE. Prior studies have provided evidence for an LPS/TLR4-mediated repression of  
518 HIV-1 expression through the induction of type I IFNs and other mechanisms. These studies  
519 employed HIV-1 infection of myeloid cells (16, 17, 58-61) or transfection using full-length viral

520 constructs (62). Our data extends these findings and demonstrates that LPS treatment  
521 represses HIV-1 expression in MDMs through its interaction with TLR4. Specifically, we show  
522 that LPS induces TLR4-mediated, TRIF-dependent production of type I IFNs, which in turn lead  
523 to the repression of HIV-1 replication in MDMs through the recruitment of IRF8 to the HIV-1  
524 ISRE.

525

526 Importantly, our data suggest that the microbial environment can influence the state of HIV-1  
527 replication and the establishment of latency in human macrophages as part of the viral reservoir  
528 in infected individuals under antiretroviral therapy (ART) regimens. Macrophages can be  
529 productively infected with HIV-1 *in vivo* and viral replication can be modulated by co-pathogens  
530 through their interactions with innate immune receptors such as TLRs (18, 63). We demonstrate  
531 that productive infection of macrophages can be altered by TLR signaling in response to purified  
532 ligands and bacterial co-infection, with TLR2- and TLR5-mediated signaling activating HIV-1  
533 and TLR3- and TLR4-mediated signaling repressing HIV-1 replication in MDMs (Figure 1).

534

535 In addition to their role in HIV-1 production, macrophages also contribute to HIV-1 persistence *in*  
536 *vivo*. Although CD4<sup>+</sup> memory T cells are thought to constitute the majority of the HIV-1  
537 reservoir, several studies have demonstrated that tissue resident macrophages in the lymph  
538 nodes (64-66), gastrointestinal tract (5, 67), genitourinary tract (2, 42, 68), liver (69-71), and  
539 lung (72-74), as well as perivascular macrophages and microglial cells in the brain (41, 75-80),  
540 can serve as tissue reservoirs for HIV-1. In SHIV-infected rhesus macaques, *in vivo* viral  
541 replication was sustained by tissue macrophages after depletion of CD4<sup>+</sup> T cells (81).

542 Moreover, HIV-1 persistence in macrophages was confirmed in HIV-1 infected humanized  
543 myeloid-only mice in which viral rebound was observed in a subset of the animals following  
544 treatment interruption (43). These studies demonstrate that macrophages have the capacity to  
545 serve as *bona fide* HIV-1 reservoirs *in vivo*. Our findings that pathogenic and commensal

546 bacteria, through engagement of TLRs, can influence HIV-1 replication in macrophages have  
547 potential clinical significance. For example, sexually transmitted infections (STIs) that induce  
548 robust type interferon production, such as GC or HSV-2, may repress virus replication in  
549 genitourinary tract macrophages that harbor HIV-1 provirus and contribute to viral escape from  
550 the immune system and from ART.

551  
552 The major obstacle to the eradication of HIV-1 is the presence of a persistent viral reservoir that  
553 that can resurface upon discontinuation of ART. The potential contribution of HIV-1 in tissue  
554 macrophages to virus rebound with the cessation of ART is not entirely understood, but recent  
555 primate studies suggest that the functional macrophage reservoir can contribute to viral rebound  
556 upon treatment cessation (82-84). Our data demonstrate that interactions between  
557 macrophages and pathogenic or commensal microorganisms within the genitourinary and  
558 gastrointestinal tracts, such as GC and *E. coli*, may alter the ability of macrophages to serve as  
559 reservoirs for viral persistence in the host. Our findings are consistent with independent studies  
560 that demonstrate that repeated stimulation of M1-polarized MDMs with proinflammatory  
561 cytokines (TNF- $\alpha$ ) and/or type II IFNs (interferon- $\gamma$ ) induce a state akin to HIV-1 latency (85). In  
562 addition, the oral pathogen *Porphyromonas gingivalis* has been shown to influence the  
563 establishment and maintenance of persistent HIV-1 infection in MDMs (86). Finally, studies  
564 have demonstrated that a subset of HIV-1-infected macrophages enter a state of viral latency  
565 characterized by altered metabolic signatures (87) and apoptotic mechanisms (87). Taken  
566 together, these studies demonstrate that co-infection, inflammatory stimuli, and metabolic  
567 alterations can influence the establishment and maintenance of the HIV-1 reservoir in  
568 macrophages. As an example, gastrointestinal macrophages constitute a major cellular  
569 reservoir for HIV-1 (5, 88-90) and are frequently exposed to microbes and microbial products  
570 either through luminal sampling (91) or microbial translocation, the latter of which is increased in  
571 HIV-positive individuals (92). Our data suggest that interactions such as those between

572 intestinal macrophages and gut-associated microbes may have clinical significance for the  
573 establishment and maintenance of the latent HIV-1 reservoir.

574

575 Our results demonstrating that *Neisseria gonorrhoeae* and *E. coli* repress HIV-1 replication in  
576 macrophages by altering transcription factor recruitment to the HIV-1 GLS and induce a state of  
577 viral latency confirm the need for further in vitro, ex vivo, and in vivo studies regarding the  
578 effects of sexually-transmitted pathogens and commensal microbes on HIV-1 persistence.

579

580

581

## 582 **ACKNOWLEDGEMENTS**

583 The authors gratefully acknowledge Dr. Laura Dickey for her scientific and editorial suggestions.

584 The following reagents were obtained through the AIDS Research and Reference Reagent

585 Program, Division of AIDS, NIAID, NIH: HIV IG from NABI and National Heart Lung and Blood

586 Institute (Dr. Luiz Barbosa); anti-p24gag monoclonal antibody clone 183-H12-5C from Dr. Bruce

587 Chesebro and Kathy Wehrly; and MAGI-CCR5 cells from Dr. Julie Overbaugh. The model figure

588 was created with Biorender.com.

589

590 This work was supported by funds obtained from the National Institutes of Health ([www.nih.gov](http://www.nih.gov))

591 grants AI073149, (G.V.), AI143567-02 (V.P.), T32-AI07309 (T.M.H.), and T32-AI0764206

592 (T.M.H.), a Boston University Division of Graduate Medical Sciences Graduate Student

593 Research Fellowship award (T.M.H.), and a Resident Research Award from the Department of

594 Pathology at the University of Utah (T.M.H.).

595

## 596 **DISCLOSURES**

597 The authors have no conflicts of interest.



598

## 599 AUTHOR CONTRIBUTIONS

600 T.M.H. and G.A.V. designed the study. T.M.H and G.A.V. developed the methodology. T.M.H.  
601 conducted experiments. T.M.H., V.P., and G.A.V. wrote the manuscript. T.M.H., V.P., and  
602 G.A.V. acquired funds. T.M.H. and G.A.V. supervised the study.

603

## 604 FIGURE LEGENDS

605

606 **Figure 1. Treatment with purified TLR ligands and intact bacteria alter HIV-1 replication at**  
607 **the level of transcription.** (A) MDMs ( $2.5 \times 10^5$  cells/well) were infected with a single-round,  
608 replication-defective HIV-luciferase reporter virus at an MOI = 0.1. After four hours, unbound  
609 virus was removed by washing with PBS and cells were cultured in complete medium. Forty-  
610 eight hours after infection, cells were treated with the TLR2 ligand PAM3CSK4 (100 ng/ml), the  
611 TLR3 ligand poly I:C (25  $\mu$ g/ml), the TLR4 ligand LPS (100 ng/ml), or the TLR5 ligand FLA-ST  
612 (100 ng/ml) for 18 hours. The cells were then lysed and assayed for luciferase activity. Bars  
613 represent the mean ( $\pm$  SD) of 11 donors, each donor tested in triplicate. (B-D) MDMs were  
614 infected as described above. Forty-eight hours after infection, cells were treated with  
615 PAM3CSK4 (100 ng/ml) or LPS (100 ng/ml) for six hours (B-C) or 24 hours (D). Cells were then  
616 lysed and assayed for viral RNA accumulation by RT-PCR. Shown are data from one  
617 representative donor (B) and composite data from eight donors at 6 hours (C) and four donors  
618 at 24 hours (D). (E) MDMs ( $1 \times 10^6$  cells/well) were infected as in (A). Forty-eight hours after  
619 infection, cells were treated with the TLR4 ligand LPS (100 ng/ml) for 4 h. Cells were then  
620 treated with actinomycin D (10  $\mu$ g/ml) to inhibit transcription. Total cytoplasmic RNA was  
621 prepared from the treated cultures at the indicated time points following actinomycin D treatment  
622 and analyzed by RT-qPCR for the expression of HIV-1 RNA. The data are the means ( $\pm$  SD)  
623 from four donors. (F) MDMs were infected as in (A). Forty-eight hours after infection, the cells

624 were cultured overnight with increasing amounts of GC. Cells were then lysed and assayed for  
625 luciferase activity. Bars represent mean ( $\pm$  SD) of seven donors, each donor tested in triplicate.  
626 (G) MDMs were infected as described above. Forty-eight hours after infection, cells were  
627 treated with GC at an MOI of 10 for 24 hours. Cells were then lysed and assayed for viral RNA  
628 accumulation by RT-qPCR. Shown are data from four donors. (H) MDMs ( $2.5 \times 10^5$  cells/well)  
629 were infected as in (A). Forty-eight hours after infection, the cells were cultured overnight with  
630 increasing amounts of *E. coli*. Cells were then lysed and assayed for luciferase activity. Bars  
631 represent mean ( $\pm$  SD) of four donors, each donor tested in triplicate. \*,  $p < 0.05$ ; \*\*,  $p < 0.01$ ;  
632 \*\*\*,  $p < 0.001$ ;  $p < 0.0001$ .

633

634 **Figure 2. TLR4 signaling is dominant in MDMs.** (A) MDMs ( $2.5 \times 10^5$  cells/well) were infected  
635 with a single-round, replication-defective HIV-luciferase reporter virus (MOI = 0.1). Forty-eight  
636 hours after infection, cells were treated with a fixed concentration of PAM3CSK4 (100 ng/ml)  
637 and increasing concentrations of LPS (1-1000 ng/ml, as indicated) or a fixed concentration of  
638 LPS (100 ng/ml) and increasing concentrations of PAM3CSK4 (1-1000 ng/ml, as indicated) for  
639 18 hours. Cells were then lysed and assayed for luciferase activity. The data are the mean ( $\pm$   
640 SD) of six donors, each donor tested in triplicate. (B-C) At eight days post-isolation, MDMs were  
641 stained with antibodies against TLR2 or TLR4 or relevant isotype controls. Receptor expression  
642 was assessed by flow cytometry. Histograms from one representative donor are shown in (B).  
643 Grey, unstained cells; black line, isotype control; red line, TLR4; green line, TLR2. Mean  
644 fluorescent intensity (MFI)  $\pm$  SD from eight donors is depicted in (C). (D-E) MDMs ( $2.5 \times 10^5$   
645 cells/well) were treated with the TLR2 ligand PAM3CSK4 (100 ng/ml), the TLR4 ligand LPS  
646 (100 ng/ml), heat-killed GC (MOI = 10), or heat-killed *E. coli* (MOI = 10) for 18 hours. Cell  
647 supernatant was harvested, filtered through a 0.2  $\mu$ m filter, and analyzed by ELISA for TNF- $\alpha$

648 (D) and IFN- $\beta$  (E) production. Data represent mean ( $\pm$  SD) of seven donors (four donors for  
649 heat-killed *E. coli*). \*,  $p < 0.05$ ; \*\*,  $p < 0.01$ ; \*\*\*,  $p < 0.001$ ;  $p < 0.0001$ .

650

651 **Figure 3. LPS- and GC-mediated repression of HIV-1 replication in MDMs requires TLR4,**

652 **TRIF, and type I IFNs.** (A) MDMs ( $2.5 \times 10^5$  cells/well) were infected with a single-round,

653 replication-defective HIV-luciferase reporter virus (MOI = 0.1). Forty-eight hours after infection,

654 cells were treated with GC (MOI = 10) in the absence (white bars) or presence (black bars) of

655 B18R (100 ng/ml) for 18 hours. The cells were then lysed and assayed for luciferase activity.

656 The data are the mean ( $\pm$  SD) of seven donors, each donor tested in triplicate. (B) MDMs ( $2.5 \times$

657  $10^5$  cells/well) were infected as above. Forty-eight hours after infection, cells were treated with

658 PAM3CSK4 (100 ng/ml), LPS (100 ng/ml), or heat-killed GC (MOI = 10) in the absence (white

659 bars) or presence (black bars) of TAK242 (1  $\mu$ g/ml) for 18 hours. The cells were then lysed and

660 assayed for luciferase activity. The data are the mean ( $\pm$  SD) of six donors, each donor tested in

661 triplicate. (C) MDMs ( $2.5 \times 10^5$  cells/well) were infected as above. Forty-eight hours after

662 infection, cells were treated with vehicle control (white bars) or with (black bars) the dynamin

663 inhibitor Dynasore (80  $\mu$ M) for 15 minutes prior to treatment with heat-killed GC (MOI = 10) for

664 18 hours. The cells were then lysed and assayed for luciferase activity. The data are the mean

665 ( $\pm$  SD) of six donors, each donor tested in triplicate. (D-E) MDMs ( $2 \times 10^6$  cells/well) were

666 transfected with a control scrambled shRNA, shRNA targeting MyD88, or shRNA targeting

667 TRIF. Knock-down of protein expression was detected by western blot (D). Transfected MDMs

668 were infected with a single-round, replication-defective HIV-luciferase reporter virus at an MOI =

669 0.1. Forty-eight hours after infection, cells were treated with PAM3CSK4 (100 ng/ml), LPS (100

670 ng/ml), heat-killed GC (MOI = 10), or PMA (10 nM) for 18 hours. The cells were then lysed and

671 assayed for luciferase activity (E). The data are the mean ( $\pm$  SD) of six donors. \*,  $p < 0.05$ ; \*\*,  $p$

672  $< 0.01$ ; \*\*\*,  $p < 0.001$ ;  $p < 0.0001$ .

673

674 **Figure 4. LPS- and GC-mediated repression of HIV-1 in MDMs is associated with changes**

675 **in IRF recruitment to the ISRE.** (A) MDMs ( $2 \times 10^6$  cells/well) were infected with a single-round,

676 replication-defective HIV-luciferase reporter virus (MOI = 0.1). Forty-eight hours after infection,

677 cells were treated with PAM3CSK4 (100 ng/ml) or LPS (100 ng/ml). At various time points after

678 TLR stimulation, cells were harvested, lysed, and total cytoplasmic RNA was extracted. Viral

679 RNA accumulation was assessed by RT-PCR. The data are the mean ( $\pm$  SD) of four donors. (B-

680 C) MDMs ( $1.2 \times 10^7$  cells/plate) were infected with a single-round replication-defective HIV-GFP

681 reporter virus at an MOI = 2. Forty-eight hours after infection, cells were treated with LPS (100

682 ng/ml). At either 1 or 24 hours after LPS treatment, cells were fixed with formaldehyde, lysed,

683 sonicated, and subjected to immunoprecipitation with antibodies against IRF1, IRF2, IRF4,

684 IRF8, or rabbit IgG (isotype control). Association with the HIV-1 ISRE was assessed by PCR

685 using HIV-1 specific primers. Data from one representative donor is depicted in (B). Composite

686 data representing the mean ( $\pm$  SD) from five donors are shown in (C). (D) MDMs ( $1.2 \times 10^7$

687 cells/plate) were infected with a single-round replication-defective HIV-GFP reporter virus at an

688 MOI = 2. Forty-eight hours after infection, cells were treated with heat-killed GC (MOI = 10).

689 Twenty-four hours after GC treatment, cells were fixed with formaldehyde, lysed, sonicated, and

690 subjected to immunoprecipitation with antibodies against IRF1, IRF2, IRF4, IRF8, or rabbit IgG

691 (isotype control). Association with the HIV-1 ISRE was assessed by PCR using HIV-1 specific

692 primers. Composite data from five donors are shown. (E-F) MDMs ( $2 \times 10^6$  cells/well) transfected

693 with a controlled scrambled shRNA (white bars) or with shRNA targeting IRF8 (black bars) were

694 infected with a single-round, replication-defective HIV-luciferase reporter virus at an MOI = 0.1.

695 Knock-down of protein expression was detected by western blot (F). Forty-eight hours after

696 infection, cells were treated with PAM3CSK4 (100 ng/ml), LPS (100 ng/ml), a combination of

697 PAM3CSK4 and LPS (each at 100 ng/ml), or GC (MOI = 10) for 18 hours. Cells were then lysed

698 and assayed for luciferase activity (F). The experiment was performed using cells from five  
699 different donors. (G-H) MDMs transfected with an empty vector (white bars) or a vector  
700 encoding IRF8 (black bars) were infected with a single-round, replication-defective HIV-  
701 luciferase reporter virus at an MOI = 0.1. IRF8 protein expression was detected by western blot  
702 (G). Forty-eight hours after infection, cells were treated with PAM3CSK4 (100 ng/ml), LPS (100  
703 ng/ml, a combination of PAM3CSK4 and LPS (each at 100 ng/ml), or GC (MOI = 10) for 18  
704 hours. Cells were then lysed and assayed for luciferase activity (H). The experiment was  
705 performed using cells from four different donors. \*,  $p < 0.05$ ; \*\*,  $p < 0.01$ ; \*\*\*,  $p < 0.001$ ;  $p <$   
706 0.0001.

707

708 **Figure 5. Treatment with LPS, GC, or type I IFNs induces a low-level persistent/latent**  
709 **infection in MDMs.** MDMs ( $2.5 \times 10^5$  cells/well) were infected with replication-competent HIV-1<sub>Ba-</sub>  
710 <sub>L</sub> (MOI of 0.1). At day 3 post-infection, the cells were treated with a single dose of PAM3CSK4  
711 (100 ng/ml), LPS (100 ng/ml), GC (MOI = 10), IFN- $\alpha$  (1000 U/ml), or IFN- $\beta$  (1000 U/ml). Cell-  
712 free supernatants were harvested every three days, and virus production was monitored by p24  
713 ELISA. Data from five independent donors, each tested in triplicate, are shown. \*,  $p < 0.05$ ; \*\*,  $p$   
714  $< 0.01$ ; \*\*\*,  $p < 0.001$ ;  $p < 0.0001$ .

715

716 **Figure 6. Co-infection with GC or *E. coli* represses HIV-1 replication by altering IRF**  
717 **recruitment to the HIV-1 GLS.** (A) Upon engagement of TLR2 and/or TLR4 by GC or *E. coli* at  
718 the cell surface, transcription factors such as NF- $\kappa$ B are phosphorylated and are subsequently  
719 recruited the HIV-1 5' LTR to drive viral transcription in MDMs. Upon engagement of TLR4 in  
720 the endosome, IRF3 and IRF7 are phosphorylated and recruited to the IFN- $\alpha$  and/or IFN- $\beta$   
721 promoters to drive type I IFN expression. (B) During the early phase of the response, type I  
722 IFNs drive the expression of ISGs, including IRFs. Signaling through endosomal TLR4 leads to

723 the activation of IRF1 and its recruitment to the HIV-1 GLS, further enhancing HIV-1  
724 transcription. (C) During the late phase of the response there is a type I IFN-dependent  
725 activation of IRF8 and subsequent recruitment to the HIV-1 GLS, thereby repressing HIV-1  
726 transcription.

727

728 **Supplemental Figure 1. Altered HIV-1 expression in MDMs in response to TLR**

729 **engagement is not sex-dependent.** MDMs ( $2.5 \times 10^5$  cells/well) were infected with a single-  
730 round, replication-defective HIV-luciferase reporter virus (MOI = 0.1). After four hours, unbound  
731 virus was removed by washing with PBS and cells were cultured in complete medium. Forty-  
732 eight hours after infection, cells were treated with the TLR2 ligand PAM3CSK4 (100 ng/ml), the  
733 TLR3 ligand poly I:C (25  $\mu$ g/ml), the TLR4 ligand LPS (100 ng/ml), or the TLR5 ligand FLA-ST  
734 (100 ng/ml) for 18 hours. The cells were then lysed and assayed for luciferase activity. Bars  
735 represent the mean ( $\pm$  SD) of five male donors and five female donors; each donor tested in  
736 triplicate. Although virus replication was decreased overall in MDMs from female donors  
737 compared to MDMs from male donors, it was activated by treatment with PAM3CSK4 and FLA-  
738 ST, and repressed by Poly I:C and LPS, in a manner similar to that seen in MDMs from male  
739 donors. \*,  $p < 0.05$ ; \*\*,  $p < 0.01$ ; \*\*\*,  $p < 0.001$ ;  $p < 0.0001$ .

740

741 **Supplemental Figure 2. TLR2-activated HIV-1 expression is mediated primarily through**

742 **NF- $\kappa$ B.** (A-B) MDMs ( $2.5 \times 10^5$  cells/well) were infected with a single-round, replication-defective  
743 HIV-luciferase reporter virus (MOI = 0.1). Forty-eight hours after infection, cells were treated  
744 with PAM3CSK4 (100 ng/ml) in the presence or absence of 10  $\mu$ M celastrol (A) or 10  $\mu$ M BAY  
745 11-7082 (B) for 18 hours. The cells were then lysed and assayed for luciferase activity. The data  
746 are the mean ( $\pm$  SD) of six donors (celastrol) or three donors (BAY 11-7082); each donor tested  
747 in triplicate. (C) HEK293-TLR2<sup>CFP</sup>TLR1<sup>YFP</sup> cells were transfected with HIV-1 LTR-luciferase

748 reporter constructs with intact NF- $\kappa$ B, mutated NF- $\kappa$ B, or deleted NF- $\kappa$ B binding sites. Following  
749 transfection, cells were treated with PAM3CSK4 (100 ng/ml) for 18 hours and then harvested  
750 and assayed for luciferase activity. Data represent the mean ( $\pm$  SD) of three independent  
751 experiments, each performed in triplicate. (D) MDMs ( $2.5 \times 10^5$  cells/well) were infected as in  
752 (A). Forty-eight hours after infection, cells were treated with PAM3CSK4 (100 ng/ml) in the  
753 presence or absence of U0126 (10  $\mu$ M), PD98059 (50  $\mu$ M), or SB203580 (10  $\mu$ M) for 18 hours.  
754 Cells were then lysed and assayed for luciferase activity. The data are the mean ( $\pm$  SD) of six  
755 donors; each donor tested in triplicate. (E) HEK293-TLR2<sup>CFP</sup>TLR1<sup>YFP</sup> cells were transfected with  
756 HIV-1 LTR-luciferase reporter constructs with intact AP-1 sites (WT LTR) or deleted AP-1  
757 binding sites (-158 LTR). Following transfection, cells were treated with PAM3CSK4 (100 ng/ml)  
758 for 18 hours and then harvested and assayed for luciferase activity. Data are the mean ( $\pm$  SD)  
759 of three independent experiments, each performed in triplicate. \*,  $p < 0.05$ ; \*\*,  $p < 0.01$ ; \*\*\*,  $p <$   
760 0.001;  $p < 0.0001$ .

761

762 **Supplemental figure 3. Heat-killed GC represses HIV-1 replication in MDMs, but activates**  
763 **it in MDCCs.** (A) MDMs were infected with a single-round, replication-defective HIV-1 luciferase  
764 reporter virus (MOI = 0.1). Forty-eight hours after infection, the cells were cultured with  
765 increasing amounts of live or heat-killed (56°C treatment) GC overnight. The cells were then  
766 lysed and luciferase activity was measured. The data are the mean ( $\pm$  SD) of three donors, each  
767 donor tested in triplicate. (B) MDMs ( $1 \times 10^6$  cells/well) were infected as in (A). Forty-eight hours  
768 after infection, cells were treated with heat-killed GC (MOI = 10) for 4 h. Cells were then treated  
769 with actinomycin D (10  $\mu$ g/ml) to inhibit transcription. Total cytoplasmic RNA was prepared from  
770 the treated cultures at the indicated time points following actinomycin D treatment and analyzed  
771 by RT-qPCR for the expression of HIV-1 RNA. The data are the means ( $\pm$  SD) from four donors.  
772 (C) MDMs were infected as in (A). Forty-eight hours after infection, cells were treated with heat-

773 killed GC (MOI = 10) or heat-killed *E. coli* (MOI = 10) for 18 hours. The cells were then lysed  
774 and assayed for luciferase activity. Bars represent the mean ( $\pm$  SD) of five male donors and five  
775 female donors; each donor tested in triplicate. Although virus replication was decreased overall  
776 in MDMs from female donors compared to MDMs from male donors, it was repressed by HKGC  
777 and HKEC in a manner similar to that seen in MDMs from male donors. \*,  $p < 0.05$ ; \*\*,  $p < 0.01$ ;  
778 \*\*\*,  $p < 0.001$ ;  $p < 0.0001$ .

779

780 **Supplemental figure 4. Dynasore inhibits endocytosis/phagocytosis of labeled *E. coli***  
781 **particles by MDMs.** (A-B) MDMs ( $5 \times 10^5$ /well) were incubated with DMSO or Dynasore (80  $\mu$ M)  
782 for 15 minutes at 37°C. The cells were washed with PBS and incubated with pHrodo Green *E.*  
783 *coli* (1 mg/ml) for 2 hours at 37°C. Endocytosis/phagocytosis was measured by flow cytometry.  
784 Shown are data from one representative donor (A) and composite data from four donors (B). \*,  
785  $p < 0.05$ ; \*\*,  $p < 0.01$ ; \*\*\*,  $p < 0.001$ ;  $p < 0.0001$ .

786

787 **Supplemental figure 5. TLR4-mediated repression of HIV-1 requires the ISRE binding site**  
788 **located in the GLS downstream of the 5' LTR.** (A) HEK293-TLR4<sup>CFP</sup>/MD-2/CD14 cells were  
789 transfected with HIV-1 LTR/GLS-luciferase reporter constructs with an intact ISRE or mutated  
790 ISRE binding site. Following transfection, cells were treated with LPS (100 ng/ml) for 18 hours  
791 and then harvested and assayed for luciferase activity. Data are the mean ( $\pm$  SD) of three  
792 independent experiments, each performed in triplicate. \*,  $p < 0.05$ ; \*\*,  $p < 0.01$ ; \*\*\*,  $p < 0.001$ ;  $p$   
793  $< 0.0001$ .

794 **Table 1. Primers used for PCR-based mutagenesis.**

| Primer Name | Sequence |
|-------------|----------|
|             |          |



|                       |                                               |
|-----------------------|-----------------------------------------------|
|                       |                                               |
| Forward mutI NF-κB    | GGACTTTCCGCTGTCTACTTTCCAGG                    |
| Reverse mutI NF-κB    | CCTGGAAAGTAGACAGCGGAAAGTCC                    |
| Forward mutII NF-κB   | GCTTTCTACAATCTACTTTCCGCTGG                    |
| Reverse mutII NF-κB   | CCAGCGGAAAGTAGATTGTAGAAAGC                    |
| Forward mutI&II NF-κB | GCTTTCTACAATCTACTTTCCGCTGTCTACTTTCCAGG        |
| Reverse mutI&II NF-κB | CCTGGAAAGTAGACAGCGGAAAGTAGATTGTAGAAAGC        |
| Forward delNF-κB      | GCTGACATCGAGCTTTCTACAAAGGGAGGTGTGGCCTGGGCGGG  |
| Reverse delNF-κB      | CCCGCCCAGGCCACACCTCCCTTTGTAGAAAGCTCGATGTCAGC  |
| Forward mutISRE       | GCCCGAACAGGGACTTGCCCGCGCCCGTAAAGCCAGAGGAGATC  |
| Reverse mutISRE       | GATCTCCTCTGGCTTTACGGGCGCGGGCAAGTCCCTGTTCCGGGC |

795

796

- 797 1. Miller CJ, Shattock RJ. 2003. Target cells in vaginal HIV transmission. *Microbes Infect*  
798 5:59-67.
- 799 2. Shen R, Richter HE, Clements RH, Novak L, Huff K, Bimczok D, Sankaran-Walters S,  
800 Dandekar S, Clapham PR, Smythies LE, Smith PD. 2009. Macrophages in vaginal but not

- 801 intestinal mucosa are monocyte-like and permissive to human immunodeficiency virus  
802 type 1 infection. *J Virol* 83:3258-67.
- 803 3. McElrath MJ, Smythe K, Randolph-Habecker J, Melton KR, Goodpaster TA, Hughes SM,  
804 Mack M, Sato A, Diaz G, Steinbach G, Novak RM, Curlin ME, Lord JD, Maenza J, Duerr A,  
805 Frahm N, Hladik F, Network NHVT. 2013. Comprehensive assessment of HIV target cells  
806 in the distal human gut suggests increasing HIV susceptibility toward the anus. *J Acquir*  
807 *Immune Defic Syndr* 63:263-71.
- 808 4. Shen R, Richter HE, Smith PD. 2011. Early HIV-1 target cells in human vaginal and  
809 ectocervical mucosa. *Am J Reprod Immunol* 65:261-7.
- 810 5. Zalar A, Figueroa MI, Ruibal-Ares B, Bare P, Cahn P, de Bracco MM, Belmonte L. 2010.  
811 Macrophage HIV-1 infection in duodenal tissue of patients on long term HAART.  
812 *Antiviral Res* 87:269-71.
- 813 6. Wong ME, Jaworowski A, Hearps AC. 2019. The HIV Reservoir in Monocytes and  
814 Macrophages. *Front Immunol* 10:1435.
- 815 7. Galvin SR, Cohen MS. 2004. The role of sexually transmitted diseases in HIV  
816 transmission. *Nat Rev Microbiol* 2:33-42.
- 817 8. Malott RJ, Keller BO, Gaudet RG, McCaw SE, Lai CC, Dobson-Belaire WN, Hobbs JL, St  
818 Michael F, Cox AD, Moraes TF, Gray-Owen SD. 2013. *Neisseria gonorrhoeae*-derived  
819 heptose elicits an innate immune response and drives HIV-1 expression. *Proc Natl Acad*  
820 *Sci U S A* 110:10234-9.
- 821 9. Jarvis GA, Chang TL. 2012. Modulation of HIV transmission by *Neisseria gonorrhoeae*:  
822 molecular and immunological aspects. *Curr HIV Res* 10:211-7.
- 823 10. Ferreira VH, Nazli A, Khan G, Mian MF, Ashkar AA, Gray-Owen S, Kaul R, Kaushic C. 2011.  
824 Endometrial epithelial cell responses to coinfecting viral and bacterial pathogens in the  
825 genital tract can activate the HIV-1 LTR in an NF $\kappa$ B- and AP-1-dependent manner. *J*  
826 *Infect Dis* 204:299-308.
- 827 11. Ding J, Rapista A, Teleshova N, Mosoyan G, Jarvis GA, Klotman ME, Chang TL. 2010.  
828 *Neisseria gonorrhoeae* enhances HIV-1 infection of primary resting CD4<sup>+</sup> T cells through  
829 TLR2 activation. *J Immunol* 184:2814-24.
- 830 12. Zhang J, Li G, Bafica A, Pantelic M, Zhang P, Broxmeyer H, Liu Y, Wetzler L, He JJ, Chen T.  
831 2005. *Neisseria gonorrhoeae* enhances infection of dendritic cells by HIV type 1. *J*  
832 *Immunol* 174:7995-8002.
- 833 13. Sanyal A, Shen C, Ding M, Reinhart TA, Chen Y, Sankapal S, Gupta P. 2019. *Neisseria*  
834 *gonorrhoeae* uses cellular proteins CXCL10 and IL8 to enhance HIV-1 transmission across  
835 cervical mucosa. *Am J Reprod Immunol* 81:e13111.
- 836 14. Mogensen TH, Paludan SR, Kilian M, Ostergaard L. 2006. Live *Streptococcus*  
837 *pneumoniae*, *Haemophilus influenzae*, and *Neisseria meningitidis* activate the  
838 inflammatory response through Toll-like receptors 2, 4, and 9 in species-specific  
839 patterns. *J Leukoc Biol* 80:267-77.
- 840 15. Dobson-Belaire WN, Rebbapragada A, Malott RJ, Yue FY, Kovacs C, Kaul R, Ostrowski  
841 MA, Gray-Owen SD. 2010. *Neisseria gonorrhoeae* effectively blocks HIV-1 replication by  
842 eliciting a potent TLR9-dependent interferon-alpha response from plasmacytoid  
843 dendritic cells. *Cell Microbiol* 12:1703-17.

- 844 16. Liu X, Mosoian A, Li-Yun Chang T, Zerhouni-Layachi B, Snyder A, Jarvis GA, Klotman ME.  
845 2006. Gonococcal lipooligosaccharide suppresses HIV infection in human primary  
846 macrophages through induction of innate immunity. *J Infect Dis* 194:751-9.
- 847 17. Kornbluth RS, Oh PS, Munis JR, Cleveland PH, Richman DD. 1989. Interferons and  
848 bacterial lipopolysaccharide protect macrophages from productive infection by human  
849 immunodeficiency virus in vitro. *J Exp Med* 169:1137-51.
- 850 18. Hanley TM, Viglianti GA. 2011. Nuclear receptor signaling inhibits HIV-1 replication in  
851 macrophages through multiple trans-repression mechanisms. *J Virol* 85:10834-50.
- 852 19. Novis CL, Archin NM, Buzon MJ, Verdin E, Round JL, Lichterfeld M, Margolis DM,  
853 Planelles V, Bosque A. 2013. Reactivation of latent HIV-1 in central memory CD4(+) T  
854 cells through TLR-1/2 stimulation. *Retrovirology* 10:119.
- 855 20. Szaniawski MA, Spivak AM, Bosque A, Planelles V. 2019. Sex Influences SAMHD1 Activity  
856 and Susceptibility to Human Immunodeficiency Virus-1 in Primary Human Macrophages.  
857 *J Infect Dis* 219:777-785.
- 858 21. Ziegler S, Altfeld M. 2016. Sex differences in HIV-1-mediated immunopathology. *Curr*  
859 *Opin HIV AIDS* 11:209-15.
- 860 22. Rodriguez-Garcia M, Biswas N, Patel MV, Barr FD, Crist SG, Ochsenbauer C, Fahey JV,  
861 Wira CR. 2013. Estradiol reduces susceptibility of CD4+ T cells and macrophages to HIV-  
862 infection. *PLoS One* 8:e62069.
- 863 23. Kawai T, Akira S. 2006. TLR signaling. *Cell Death Differ* 13:816-25.
- 864 24. Nabel G, Baltimore D. 1987. An inducible transcription factor activates expression of  
865 human immunodeficiency virus in T cells. *Nature* 326:711-3.
- 866 25. Perkins ND, Edwards NL, Duckett CS, Agranoff AB, Schmid RM, Nabel GJ. 1993. A  
867 cooperative interaction between NF-kappa B and Sp1 is required for HIV-1 enhancer  
868 activation. *EMBO J* 12:3551-8.
- 869 26. Van Lint C, Amella CA, Emiliani S, John M, Jie T, Verdin E. 1997. Transcription factor  
870 binding sites downstream of the human immunodeficiency virus type 1 transcription  
871 start site are important for virus infectivity. *J Virol* 71:6113-27.
- 872 27. Canonne-Hergaux F, Aunis D, Schaeffer E. 1995. Interactions of the transcription factor  
873 AP-1 with the long terminal repeat of different human immunodeficiency virus type 1  
874 strains in Jurkat, glial, and neuronal cells. *J Virol* 69:6634-42.
- 875 28. Pierce JW, Schoenleber R, Jesmok G, Best J, Moore SA, Collins T, Gerritsen ME. 1997.  
876 Novel inhibitors of cytokine-induced I kappa Balpha phosphorylation and endothelial cell  
877 adhesion molecule expression show anti-inflammatory effects in vivo. *J Biol Chem*  
878 272:21096-103.
- 879 29. Lee JH, Koo TH, Yoon H, Jung HS, Jin HZ, Lee K, Hong YS, Lee JJ. 2006. Inhibition of NF-  
880 kappa B activation through targeting I kappa B kinase by celastrol, a quinone methide  
881 triterpenoid. *Biochem Pharmacol* 72:1311-21.
- 882 30. Ono Y, Maejima Y, Saito M, Sakamoto K, Horita S, Shimomura K, Inoue S, Kotani J. 2020.  
883 TAK-242, a specific inhibitor of Toll-like receptor 4 signalling, prevents endotoxemia-  
884 induced skeletal muscle wasting in mice. *Sci Rep* 10:694.
- 885 31. Kagan JC, Su T, Horng T, Chow A, Akira S, Medzhitov R. 2008. TRAM couples endocytosis  
886 of Toll-like receptor 4 to the induction of interferon-beta. *Nat Immunol* 9:361-8.

- 887 32. Nasr N, Alshehri AA, Wright TK, Shahid M, Heiner BM, Harman AN, Botting RA, Helbig KJ,  
888 Beard MR, Suzuki K, Kelleher AD, Hertzog P, Cunningham AL. 2017. Mechanism of  
889 Interferon-Stimulated Gene Induction in HIV-1-Infected Macrophages. *J Virol* 91.
- 890 33. Sheikh F, Dickensheets H, Gamero AM, Vogel SN, Donnelly RP. 2014. An essential role  
891 for IFN-beta in the induction of IFN-stimulated gene expression by LPS in macrophages. *J*  
892 *Leukoc Biol* 96:591-600.
- 893 34. Sgarbanti M, Borsetti A, Moscufo N, Bellocchi MC, Ridolfi B, Nappi F, Marsili G, Marziali  
894 G, Coccia EM, Ensoli B, Battistini A. 2002. Modulation of human immunodeficiency virus  
895 1 replication by interferon regulatory factors. *J Exp Med* 195:1359-70.
- 896 35. Yamamoto M, Kato T, Hotta C, Nishiyama A, Kurotaki D, Yoshinari M, Takami M, Ichino  
897 M, Nakazawa M, Matsuyama T, Kamijo R, Kitagawa S, Ozato K, Tamura T. 2011. Shared  
898 and distinct functions of the transcription factors IRF4 and IRF8 in myeloid cell  
899 development. *PLoS One* 6:e25812.
- 900 36. Barber SA, Fultz MJ, Salkowski CA, Vogel SN. 1995. Differential expression of interferon  
901 regulatory factor 1 (IRF-1), IRF-2, and interferon consensus sequence binding protein  
902 genes in lipopolysaccharide (LPS)-responsive and LPS-hyporesponsive macrophages.  
903 *Infect Immun* 63:601-8.
- 904 37. Gupta M, Shin DM, Ramakrishna L, Goussetis DJ, Plataniias LC, Xiong H, Morse HC, 3rd,  
905 Ozato K. 2015. IRF8 directs stress-induced autophagy in macrophages and promotes  
906 clearance of *Listeria monocytogenes*. *Nat Commun* 6:6379.
- 907 38. Thornton AM, Buller RM, DeVico AL, Wang IM, Ozato K. 1996. Inhibition of human  
908 immunodeficiency virus type 1 and vaccinia virus infection by a dominant negative  
909 factor of the interferon regulatory factor family expressed in monocytic cells. *Proc Natl*  
910 *Acad Sci U S A* 93:383-7.
- 911 39. Munier S, Delcroix-Genete D, Carthagena L, Gumez A, Hazan U. 2005. Characterization  
912 of two candidate genes, NCoA3 and IRF8, potentially involved in the control of HIV-1  
913 latency. *Retrovirology* 2:73.
- 914 40. Negishi H, Ohba Y, Yanai H, Takaoka A, Honma K, Yui K, Matsuyama T, Taniguchi T,  
915 Honda K. 2005. Negative regulation of Toll-like-receptor signaling by IRF-4. *Proc Natl*  
916 *Acad Sci U S A* 102:15989-94.
- 917 41. Abreu C, Shirk EN, Queen SE, Beck SE, Mangus LM, Pate KAM, Mankowski JL, Gama L,  
918 Clements JE. 2019. Brain macrophages harbor latent, infectious simian  
919 immunodeficiency virus. *Aids* 33 Suppl 2:S181-s188.
- 920 42. Ganor Y, Real F, Sennepin A, Dutertre CA, Prevedel L, Xu L, Tudor D, Charmeteau B,  
921 Couedel-Courteille A, Marion S, Zenak AR, Jourdain JP, Zhou Z, Schmitt A, Capron C,  
922 Eugenin EA, Cheynier R, Revol M, Cristofari S, Hosmalin A, Bomsel M. 2019. HIV-1  
923 reservoirs in urethral macrophages of patients under suppressive antiretroviral therapy.  
924 *Nat Microbiol* 4:633-644.
- 925 43. Honeycutt JB, Thayer WO, Baker CE, Ribeiro RM, Lada SM, Cao Y, Cleary RA, Hudgens  
926 MG, Richman DD, Garcia JV. 2017. HIV persistence in tissue macrophages of humanized  
927 myeloid-only mice during antiretroviral therapy. *Nat Med* 23:638-643.
- 928 44. Smith PD, Meng G, Salazar-Gonzalez JF, Shaw GM. 2003. Macrophage HIV-1 infection  
929 and the gastrointestinal tract reservoir. *J Leukoc Biol* 74:642-9.

- 930 45. Harman AN, Lai J, Turville S, Samarajiwa S, Gray L, Marsden V, Mercier SK, Jones K, Nasr  
931 N, Rustagi A, Cumming H, Donaghy H, Mak J, Gale M, Jr., Churchill M, Hertzog P,  
932 Cunningham AL. 2011. HIV infection of dendritic cells subverts the IFN induction  
933 pathway via IRF-1 and inhibits type 1 IFN production. *Blood* 118:298-308.
- 934 46. Marsili G, Borsetti A, Sgarbanti M, Remoli AL, Ridolfi B, Stellacci E, Ensoli B, Battistini A.  
935 2003. On the role of interferon regulatory factors in HIV-1 replication. *Ann N Y Acad Sci*  
936 1010:29-42.
- 937 47. Marsili G, Remoli AL, Sgarbanti M, Battistini A. 2004. Role of acetylases and deacetylase  
938 inhibitors in IRF-1-mediated HIV-1 long terminal repeat transcription. *Ann N Y Acad Sci*  
939 1030:636-43.
- 940 48. Hu Y, Park-Min KH, Yarilina A, Ivashkiv LB. 2008. Regulation of STAT pathways and IRF1  
941 during human dendritic cell maturation by TNF-alpha and PGE2. *J Leukoc Biol* 84:1353-  
942 60.
- 943 49. Liljeroos M, Vuolteenaho R, Rounioja S, Henriques-Normark B, Hallman M, Ojaniemi M.  
944 2008. Bacterial ligand of TLR2 signals Stat activation via induction of IRF1/2 and  
945 interferon-alpha production. *Cell Signal* 20:1873-81.
- 946 50. Sgarbanti M, Marsili G, Remoli AL, Ridolfi B, Stellacci E, Borsetti A, Ensoli B, Battistini A.  
947 2004. Analysis of the signal transduction pathway leading to human immunodeficiency  
948 virus-1-induced interferon regulatory factor-1 upregulation. *Ann N Y Acad Sci* 1030:187-  
949 95.
- 950 51. Sgarbanti M, Remoli AL, Marsili G, Ridolfi B, Borsetti A, Perrotti E, Orsatti R, Ilari R,  
951 Sernicola L, Stellacci E, Ensoli B, Battistini A. 2008. IRF-1 is required for full NF-kappaB  
952 transcriptional activity at the human immunodeficiency virus type 1 long terminal  
953 repeat enhancer. *J Virol* 82:3632-41.
- 954 52. Negishi H, Fujita Y, Yanai H, Sakaguchi S, Ouyang X, Shinohara M, Takayanagi H, Ohba Y,  
955 Taniguchi T, Honda K. 2006. Evidence for licensing of IFN-gamma-induced IFN regulatory  
956 factor 1 transcription factor by MyD88 in Toll-like receptor-dependent gene induction  
957 program. *Proc Natl Acad Sci U S A* 103:15136-41.
- 958 53. Tamura T, Ozato K. 2002. ICSBP/IRF-8: its regulatory roles in the development of  
959 myeloid cells. *J Interferon Cytokine Res* 22:145-52.
- 960 54. Zhao J, Kong HJ, Li H, Huang B, Yang M, Zhu C, Bogunovic M, Zheng F, Mayer L, Ozato K,  
961 Unkeless J, Xiong H. 2006. IRF-8/interferon (IFN) consensus sequence-binding protein is  
962 involved in Toll-like receptor (TLR) signaling and contributes to the cross-talk between  
963 TLR and IFN-gamma signaling pathways. *J Biol Chem* 281:10073-80.
- 964 55. Bovolenta C, Driggers PH, Marks MS, Medin JA, Politis AD, Vogel SN, Levy DE, Sakaguchi  
965 K, Appella E, Coligan JE, et al. 1994. Molecular interactions between interferon  
966 consensus sequence binding protein and members of the interferon regulatory factor  
967 family. *Proc Natl Acad Sci U S A* 91:5046-50.
- 968 56. Meraro D, Hashmueli S, Koren B, Azriel A, Oumard A, Kirchhoff S, Hauser H, Nagulapalli  
969 S, Atchison ML, Levi BZ. 1999. Protein-protein and DNA-protein interactions affect the  
970 activity of lymphoid-specific IFN regulatory factors. *J Immunol* 163:6468-78.
- 971 57. Langlais D, Barreiro LB, Gros P. 2016. The macrophage IRF8/IRF1 regulome is required  
972 for protection against infections and is associated with chronic inflammation. *J Exp Med*  
973 213:585-603.

- 974 58. Ahmed N, Hayashi T, Hasegawa A, Furukawa H, Okamura N, Chida T, Masuda T, Kannagi  
975 M. 2010. Suppression of human immunodeficiency virus type 1 replication in  
976 macrophages by commensal bacteria preferentially stimulating Toll-like receptor 4. *J*  
977 *Gen Virol* 91:2804-13.
- 978 59. Bernstein MS, Tong-Starksen SE, Locksley RM. 1991. Activation of human monocyte--  
979 derived macrophages with lipopolysaccharide decreases human immunodeficiency virus  
980 replication in vitro at the level of gene expression. *J Clin Invest* 88:540-5.
- 981 60. Equils O, Salehi KK, Cornateanu R, Lu D, Singh S, Whittaker K, Baldwin GC. 2006.  
982 Repeated lipopolysaccharide (LPS) exposure inhibits HIV replication in primary human  
983 macrophages. *Microbes Infect* 8:2469-76.
- 984 61. Simard S, Maurais E, Gilbert C, Tremblay MJ. 2008. LPS reduces HIV-1 replication in  
985 primary human macrophages partly through an endogenous production of type I  
986 interferons. *Clin Immunol* 127:198-205.
- 987 62. Nordone SK, Ignacio GA, Su L, Sempowski GD, Golenbock DT, Li L, Dean GA. 2007. Failure  
988 of TLR4-driven NF-kappa B activation to stimulate virus replication in models of HIV type  
989 1 activation. *AIDS Res Hum Retroviruses* 23:1387-95.
- 990 63. Appelberg KS, Wallet MA, Taylor JP, Cash MN, Sleasman JW, Goodenow MM. 2017. HIV-  
991 1 Infection Primes Macrophages Through STAT Signaling to Promote Enhanced  
992 Inflammation and Viral Replication. *AIDS Res Hum Retroviruses* 33:690-702.
- 993 64. Embretson J, Zupancic M, Ribas JL, Burke A, Racz P, Tenner-Racz K, Haase AT. 1993.  
994 Massive covert infection of helper T lymphocytes and macrophages by HIV during the  
995 incubation period of AIDS. *Nature* 362:359-62.
- 996 65. Orenstein JM, Fox C, Wahl SM. 1997. Macrophages as a source of HIV during  
997 opportunistic infections. *Science* 276:1857-61.
- 998 66. DiNapoli SR, Ortiz AM, Wu F, Matsuda K, Twigg HL, 3rd, Hirsch VM, Knox K, Brenchley  
999 JM. 2017. Tissue-resident macrophages can contain replication-competent virus in  
1000 antiretroviral-naive, SIV-infected Asian macaques. *JCI Insight* 2:e91214.
- 1001 67. Yukl SA, Sinclair E, Somsouk M, Hunt PW, Epling L, Killian M, Girling V, Li P, Havlir DV,  
1002 Deeks SG, Wong JK, Hatano H. 2014. A comparison of methods for measuring rectal HIV  
1003 levels suggests that HIV DNA resides in cells other than CD4+ T cells, including myeloid  
1004 cells. *AIDS* 28:439-42.
- 1005 68. Ganor Y, Zhou Z, Bodo J, Tudor D, Leibowitch J, Mathez D, Schmitt A, Vacher-Lavenu MC,  
1006 Revol M, Bomsel M. 2013. The adult penile urethra is a novel entry site for HIV-1 that  
1007 preferentially targets resident urethral macrophages. *Mucosal Immunol* 6:776-86.
- 1008 69. Schmitt MP, Gendrault JL, Schweitzer C, Steffan AM, Beyer C, Royer C, Jaeck D, Pasquali  
1009 JL, Kirn A, Aubertin AM. 1990. Permissivity of primary cultures of human Kupffer cells for  
1010 HIV-1. *AIDS Res Hum Retroviruses* 6:987-91.
- 1011 70. Hufert FT, Schmitz J, Schreiber M, Schmitz H, Racz P, von Laer DD. 1993. Human Kupffer  
1012 cells infected with HIV-1 in vivo. *J Acquir Immune Defic Syndr (1988)* 6:772-7.
- 1013 71. Mosoian A, Zhang L, Hong F, Cunyat F, Rahman A, Bhalla R, Panchal A, Saiman Y, Fiel MI,  
1014 Florman S, Roayaie S, Schwartz M, Branch A, Stevenson M, Bansal MB. 2017. Frontline  
1015 Science: HIV infection of Kupffer cells results in an amplified proinflammatory response  
1016 to LPS. *J Leukoc Biol* 101:1083-1090.

- 1017 72. Sierra-Madero JG, Toossi Z, Hom DL, Finegan CK, Hoenig E, Rich EA. 1994. Relationship  
1018 between load of virus in alveolar macrophages from human immunodeficiency virus  
1019 type 1-infected persons, production of cytokines, and clinical status. *J Infect Dis* 169:18-  
1020 27.
- 1021 73. Jambo KC, Banda DH, Kankwatira AM, Sukumar N, Allain TJ, Heyderman RS, Russell DG,  
1022 Mwandumba HC. 2014. Small alveolar macrophages are infected preferentially by HIV  
1023 and exhibit impaired phagocytic function. *Mucosal Immunol* 7:1116-26.
- 1024 74. Cribbs SK, Lennox J, Caliendo AM, Brown LA, Guidot DM. 2015. Healthy HIV-1-infected  
1025 individuals on highly active antiretroviral therapy harbor HIV-1 in their alveolar  
1026 macrophages. *AIDS Res Hum Retroviruses* 31:64-70.
- 1027 75. Stoler MH, Eskin TA, Benn S, Angerer RC, Angerer LM. 1986. Human T-cell lymphotropic  
1028 virus type III infection of the central nervous system. A preliminary in situ analysis. *JAMA*  
1029 256:2360-4.
- 1030 76. Wiley CA, Schrier RD, Nelson JA, Lampert PW, Oldstone MB. 1986. Cellular localization  
1031 of human immunodeficiency virus infection within the brains of acquired immune  
1032 deficiency syndrome patients. *Proc Natl Acad Sci U S A* 83:7089-93.
- 1033 77. Fischer-Smith T, Croul S, Sverstiuk AE, Capini C, L'Heureux D, Regulier EG, Richardson  
1034 MW, Amini S, Morgello S, Khalili K, Rappaport J. 2001. CNS invasion by CD14+/CD16+  
1035 peripheral blood-derived monocytes in HIV dementia: perivascular accumulation and  
1036 reservoir of HIV infection. *J Neurovirol* 7:528-41.
- 1037 78. Cosenza MA, Zhao ML, Si Q, Lee SC. 2002. Human brain parenchymal microglia express  
1038 CD14 and CD45 and are productively infected by HIV-1 in HIV-1 encephalitis. *Brain*  
1039 125:442-55.
- 1040 79. Ko A, Kang G, Hattler JB, Galadima HI, Zhang J, Li Q, Kim WK. 2019. Macrophages but not  
1041 Astrocytes Harbor HIV DNA in the Brains of HIV-1-Infected Aviremic Individuals on  
1042 Suppressing Antiretroviral Therapy. *J Neuroimmune Pharmacol* 14:110-119.
- 1043 80. Micci L, Alvarez X, Iriete RI, Ortiz AM, Ryan ES, McGary CS, Deleage C, McAtee BB, He T,  
1044 Apetrei C, Easley K, Pahwa S, Collman RG, Derdeyn CA, Davenport MP, Estes JD, Silvestri  
1045 G, Lackner AA, Paiardini M. 2014. CD4 depletion in SIV-infected macaques results in  
1046 macrophage and microglia infection with rapid turnover of infected cells. *PLoS Pathog*  
1047 10:e1004467.
- 1048 81. Igarashi T, Brown CR, Endo Y, Buckler-White A, Plishka R, Bischofberger N, Hirsch V,  
1049 Martin MA. 2001. Macrophage are the principal reservoir and sustain high virus loads in  
1050 rhesus macaques after the depletion of CD4+ T cells by a highly pathogenic simian  
1051 immunodeficiency virus/HIV type 1 chimera (SHIV): Implications for HIV-1 infections of  
1052 humans. *Proc Natl Acad Sci U S A* 98:658-63.
- 1053 82. Abreu CM, Veenhuis RT, Avalos CR, Graham S, Parrilla DR, Ferreira EA, Queen SE, Shirk  
1054 EN, Bullock BT, Li M, Metcalf Pate KA, Beck SE, Mangus LM, Mankowski JL, Mac Gabhann  
1055 F, O'Connor SL, Gama L, Clements JE. 2019. Myeloid and CD4 T Cells Comprise the Latent  
1056 Reservoir in Antiretroviral Therapy-Suppressed SIVmac251-Infected Macaques. *MBio* 10.
- 1057 83. Abreu CM, Veenhuis RT, Avalos CR, Graham S, Queen SE, Shirk EN, Bullock BT, Li M,  
1058 Metcalf Pate KA, Beck SE, Mangus LM, Mankowski JL, Clements JE, Gama L. 2019.  
1059 Infectious Virus Persists in CD4(+) T Cells and Macrophages in Antiretroviral Therapy-  
1060 Suppressed Simian Immunodeficiency Virus-Infected Macaques. *J Virol* 93.

- 1061 84. Andrade VM, Mavian C, Babic D, Cordeiro T, Sharkey M, Barrios L, Brander C, Martinez-  
1062 Picado J, Dalmau J, Llano A, Li JZ, Jacobson J, Lavine CL, Seaman MS, Salemi M,  
1063 Stevenson M. 2020. A minor population of macrophage-tropic HIV-1 variants is  
1064 identified in recrudescing viremia following analytic treatment interruption. *Proc Natl*  
1065 *Acad Sci U S A* 117:9981-9990.
- 1066 85. Graziano F, Aimola G, Forlani G, Turrini F, Accolla RS, Vicenzi E, Poli G. 2018. Reversible  
1067 Human Immunodeficiency Virus Type-1 Latency in Primary Human Monocyte-Derived  
1068 Macrophages Induced by Sustained M1 Polarization. *Sci Rep* 8:14249.
- 1069 86. Agosto LM, Hirnet JB, Michaels DH, Shaik-Dasthagirisahab YB, Gibson FC, Viglianti G,  
1070 Henderson AJ. 2016. Porphyromonas gingivalis-mediated signaling through TLR4  
1071 mediates persistent HIV infection of primary macrophages. *Virology* 499:72-81.
- 1072 87. Castellano P, Prevedel L, Valdebenito S, Eugenin EA. 2019. HIV infection and latency  
1073 induce a unique metabolic signature in human macrophages. *Sci Rep* 9:3941.
- 1074 88. Josefsson L, von Stockenstrom S, Faria NR, Sinclair E, Bacchetti P, Killian M, Epling L, Tan  
1075 A, Ho T, Lemey P, Shao W, Hunt PW, Somsouk M, Wylie W, Douek DC, Loeb L, Custer J,  
1076 Hoh R, Poole L, Deeks SG, Hecht F, Palmer S. 2013. The HIV-1 reservoir in eight patients  
1077 on long-term suppressive antiretroviral therapy is stable with few genetic changes over  
1078 time. *Proc Natl Acad Sci U S A* 110:E4987-96.
- 1079 89. Moore AC, Bixler SL, Lewis MG, Verthelyi D, Mattapallil JJ. 2012. Mucosal and peripheral  
1080 Lin- HLA-DR+ CD11c/123- CD13+ CD14- mononuclear cells are preferentially infected  
1081 during acute simian immunodeficiency virus infection. *J Virol* 86:1069-78.
- 1082 90. Yukl SA, Shergill AK, Ho T, Killian M, Girling V, Epling L, Li P, Wong LK, Crouch P, Deeks  
1083 SG, Havlir DV, McQuaid K, Sinclair E, Wong JK. 2013. The distribution of HIV DNA and  
1084 RNA in cell subsets differs in gut and blood of HIV-positive patients on ART: implications  
1085 for viral persistence. *J Infect Dis* 208:1212-20.
- 1086 91. Schulz O, Jaensson E, Persson EK, Liu X, Worbs T, Agace WW, Pabst O. 2009. Intestinal  
1087 CD103+, but not CX3CR1+, antigen sampling cells migrate in lymph and serve classical  
1088 dendritic cell functions. *J Exp Med* 206:3101-14.
- 1089 92. Brenchley JM, Price DA, Schacker TW, Asher TE, Silvestri G, Rao S, Kazzaz Z, Bornstein E,  
1090 Lambotte O, Altmann D, Blazar BR, Rodriguez B, Teixeira-Johnson L, Landay A, Martin JN,  
1091 Hecht FM, Picker LJ, Lederman MM, Deeks SG, Douek DC. 2006. Microbial translocation  
1092 is a cause of systemic immune activation in chronic HIV infection. *Nat Med* 12:1365-71.  
1093



**A**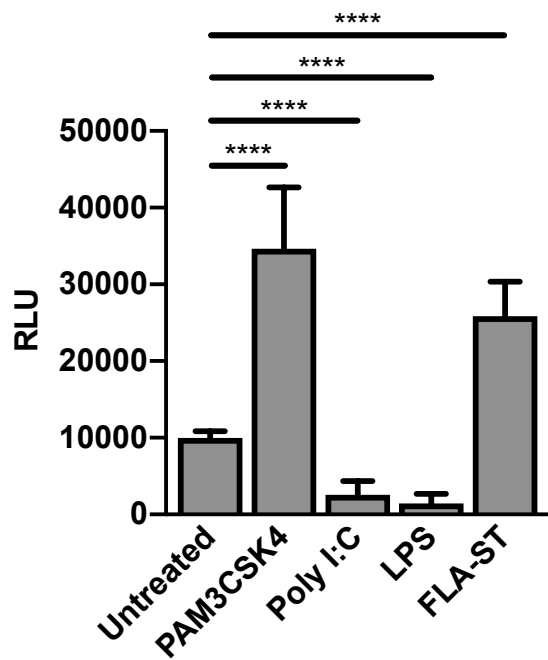**B**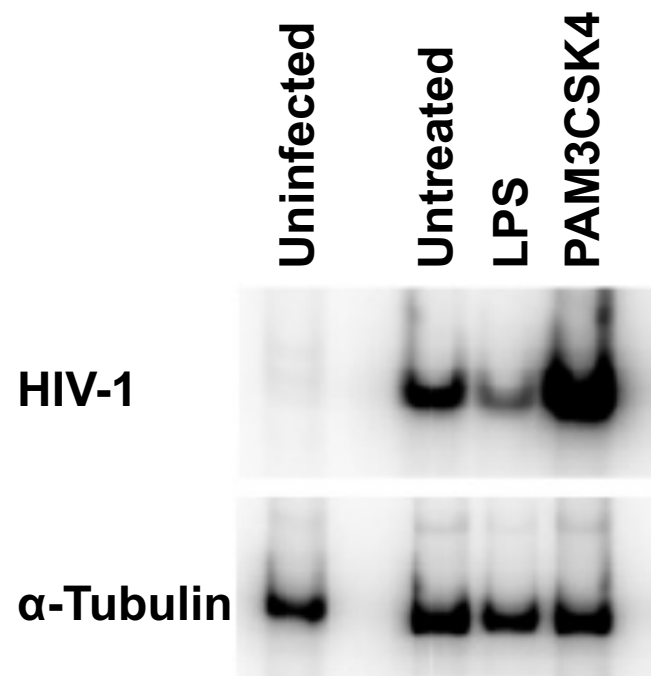**C**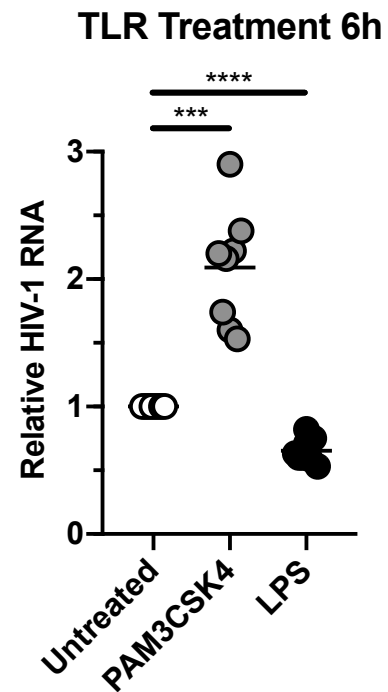**D**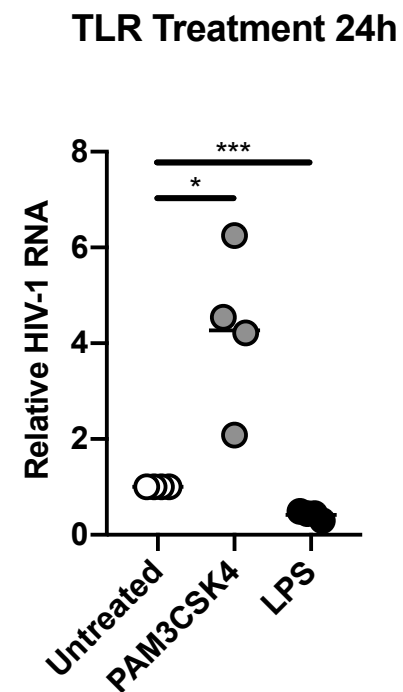

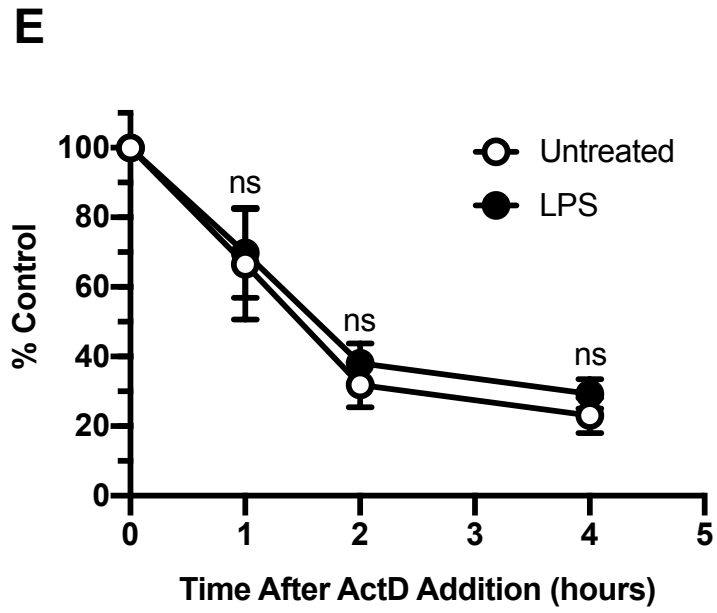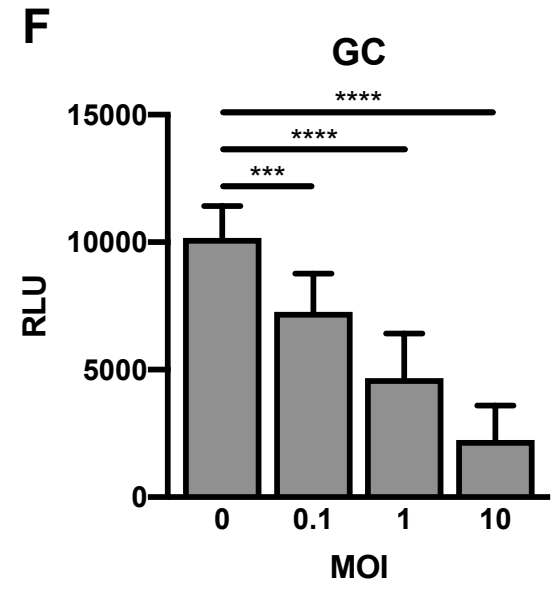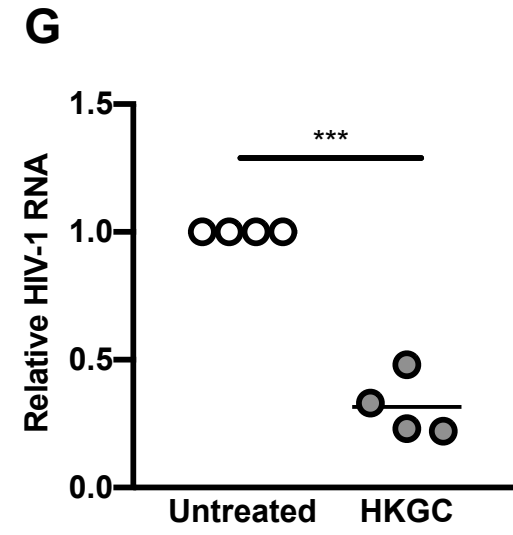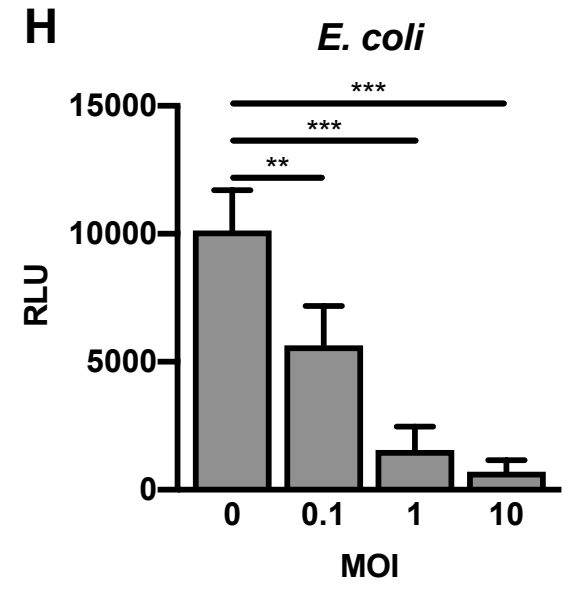

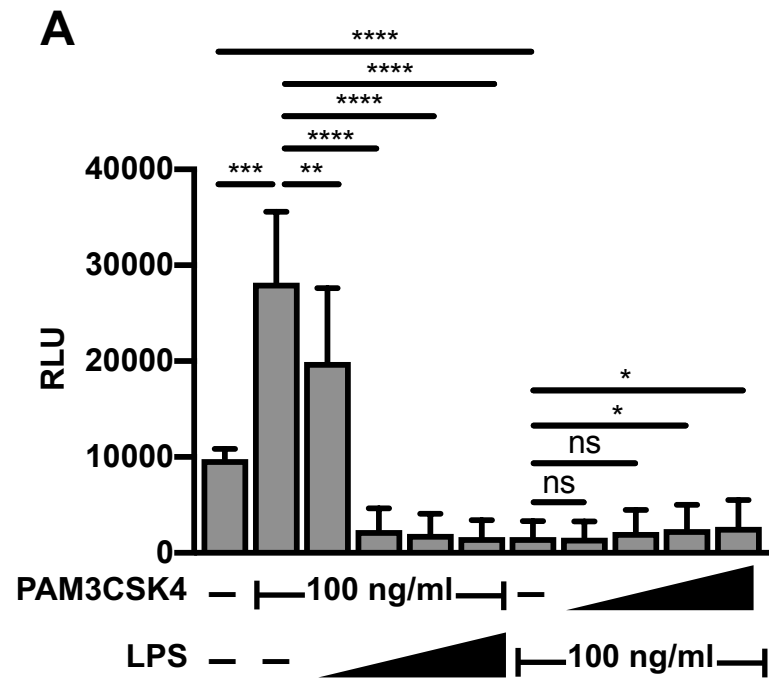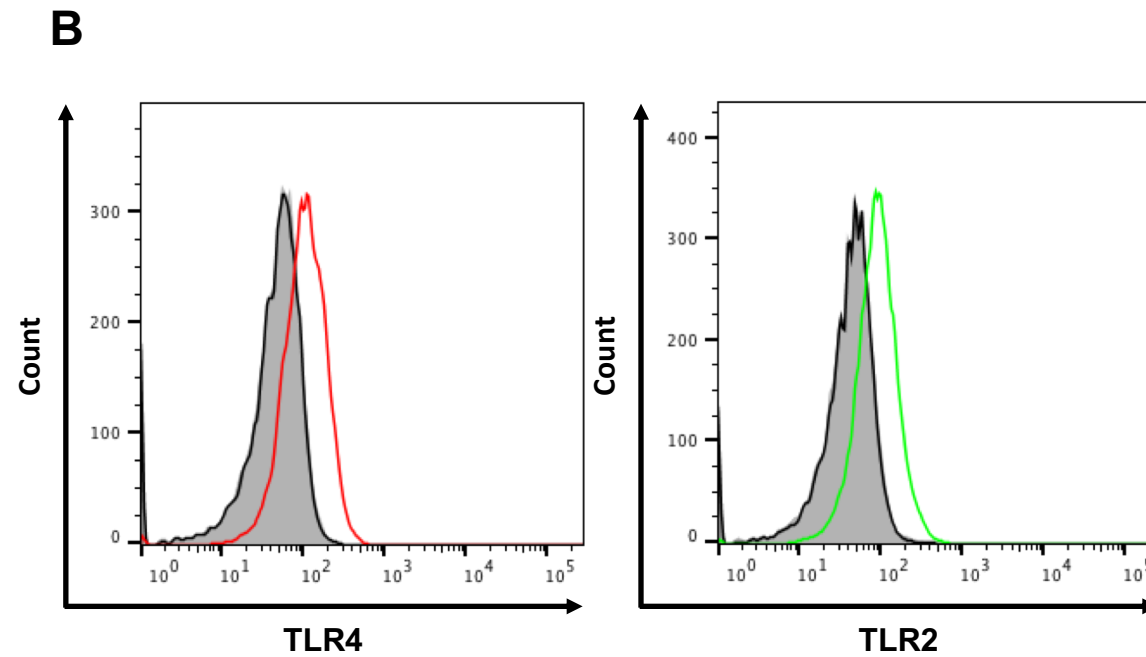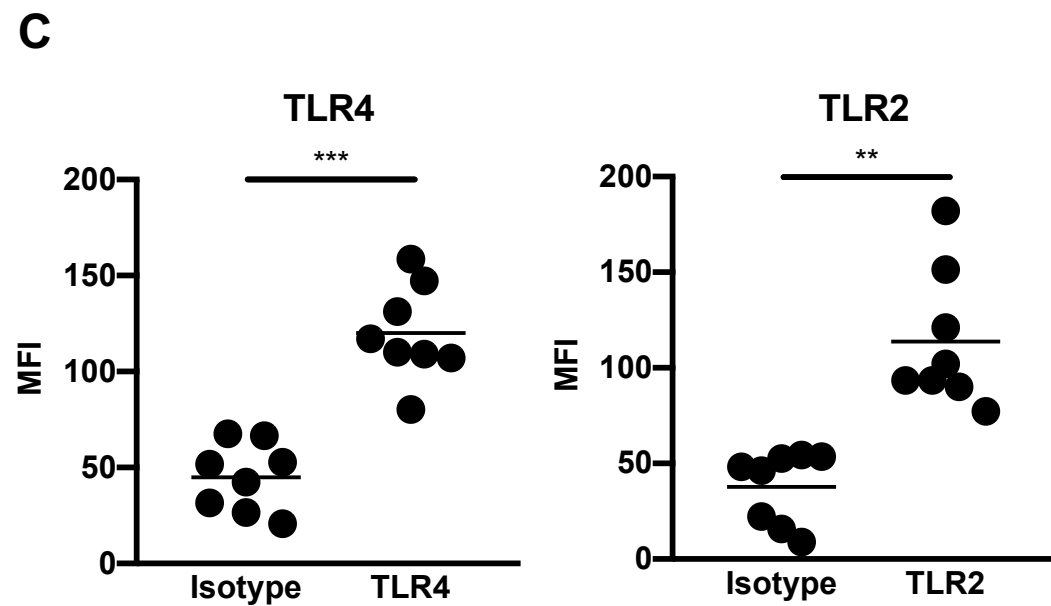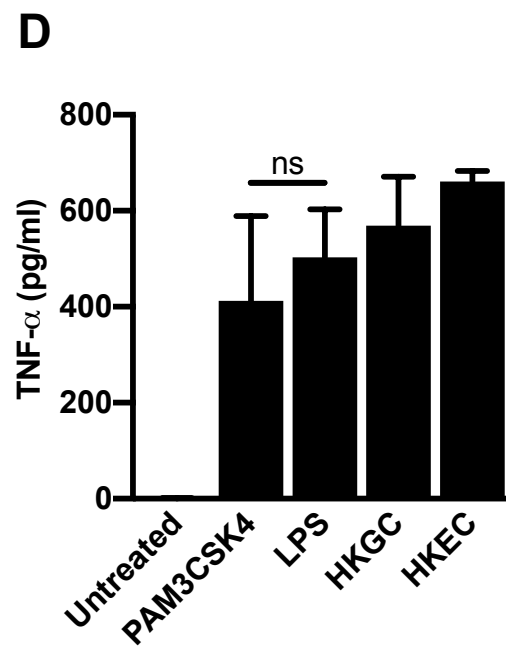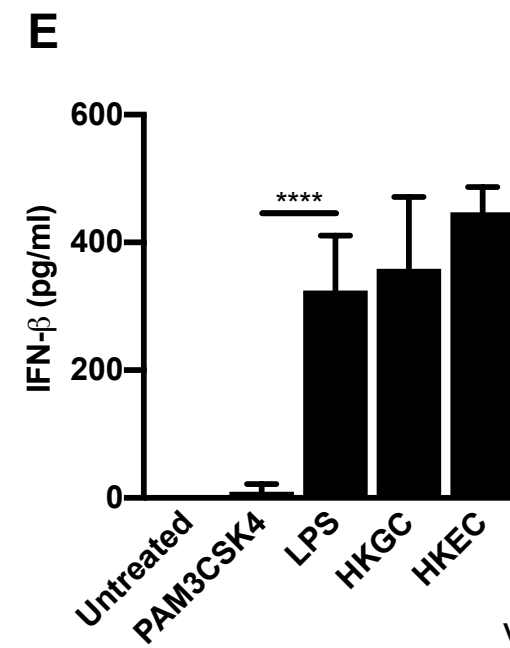

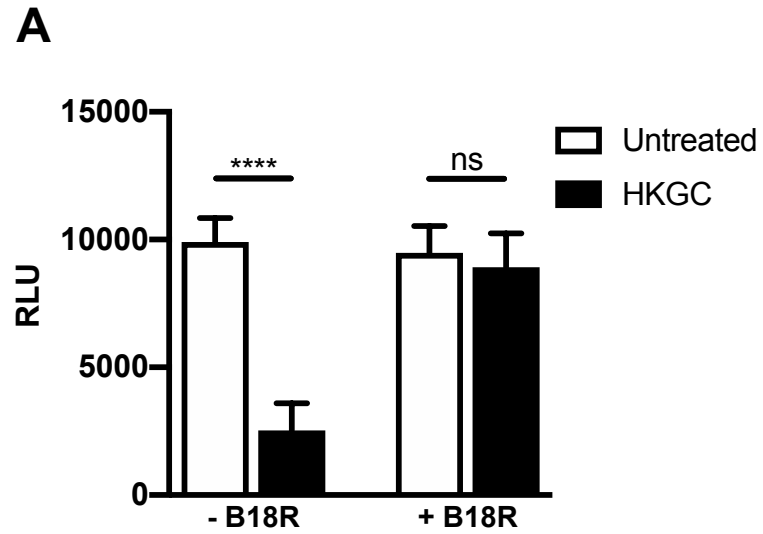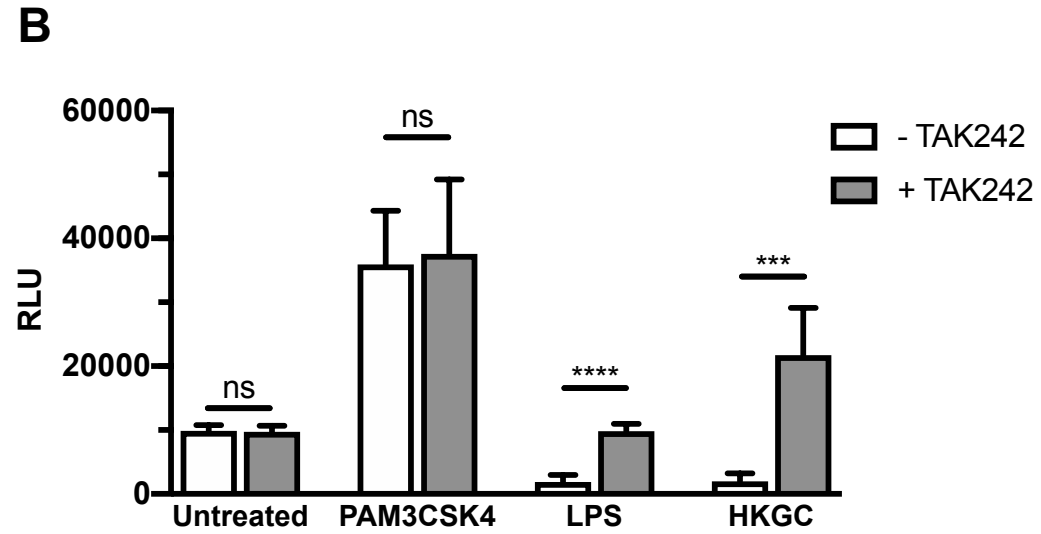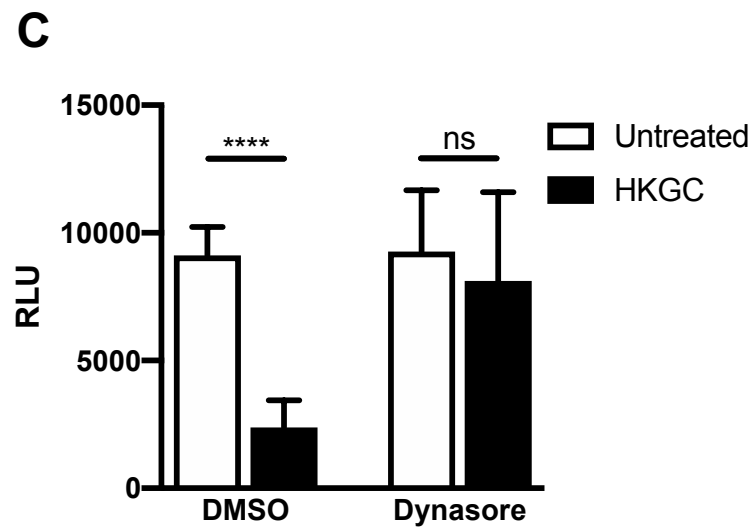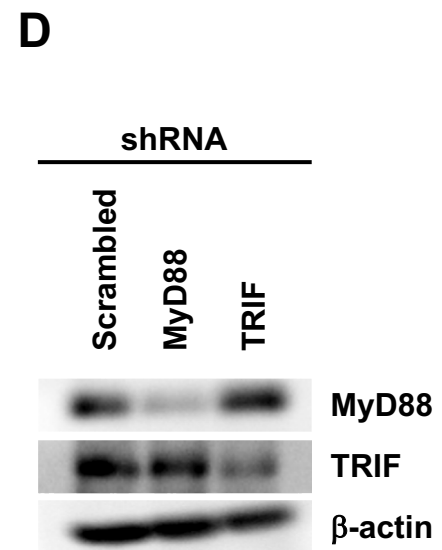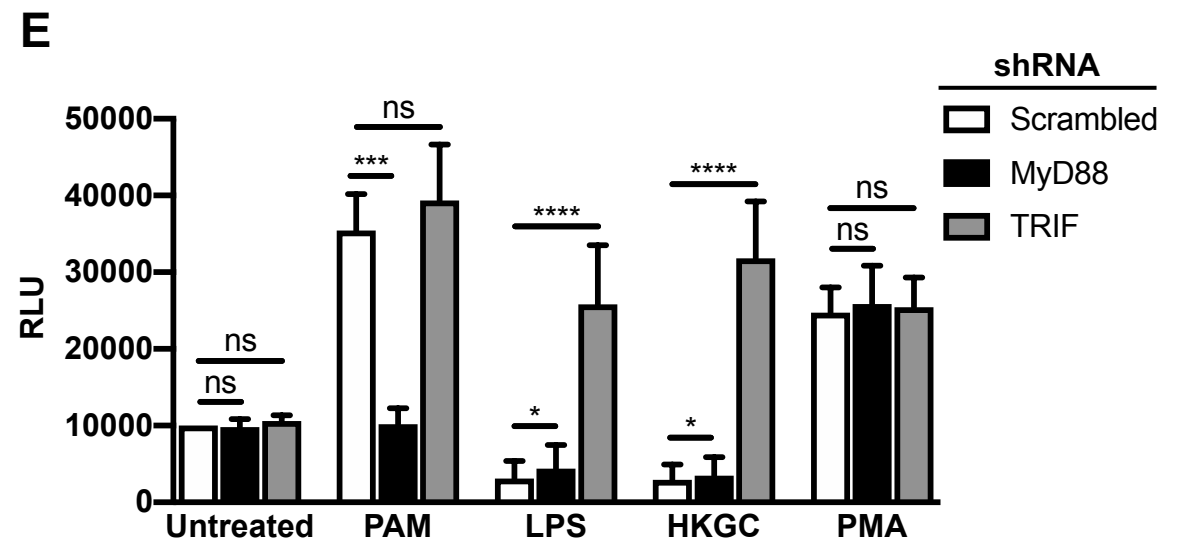

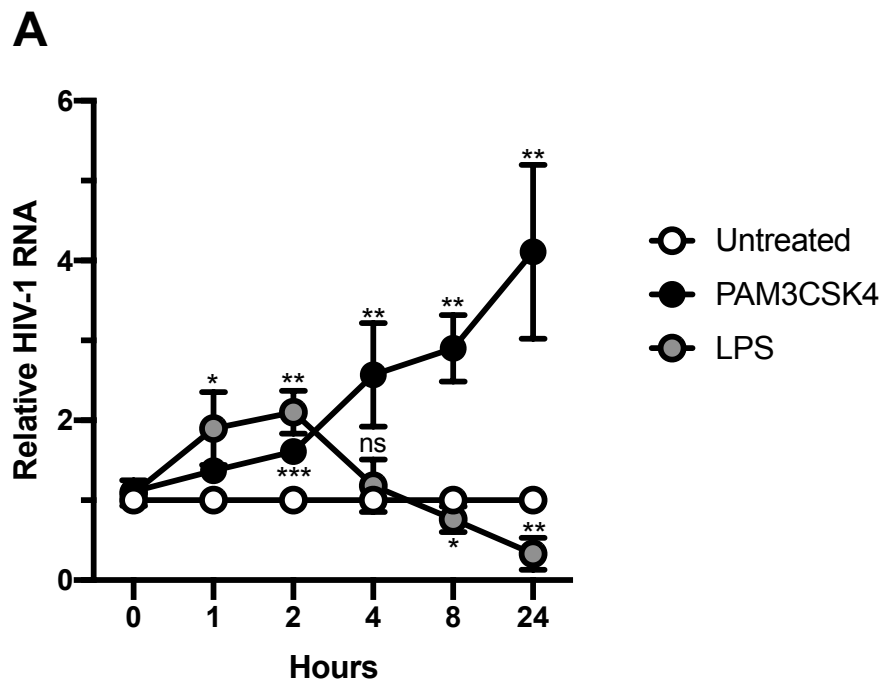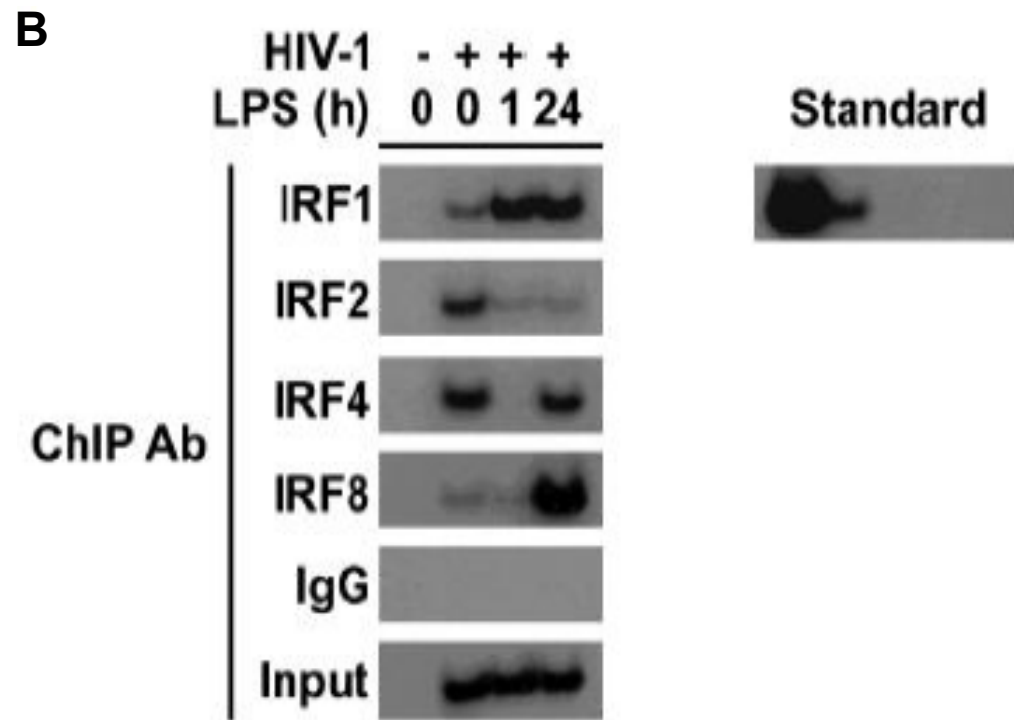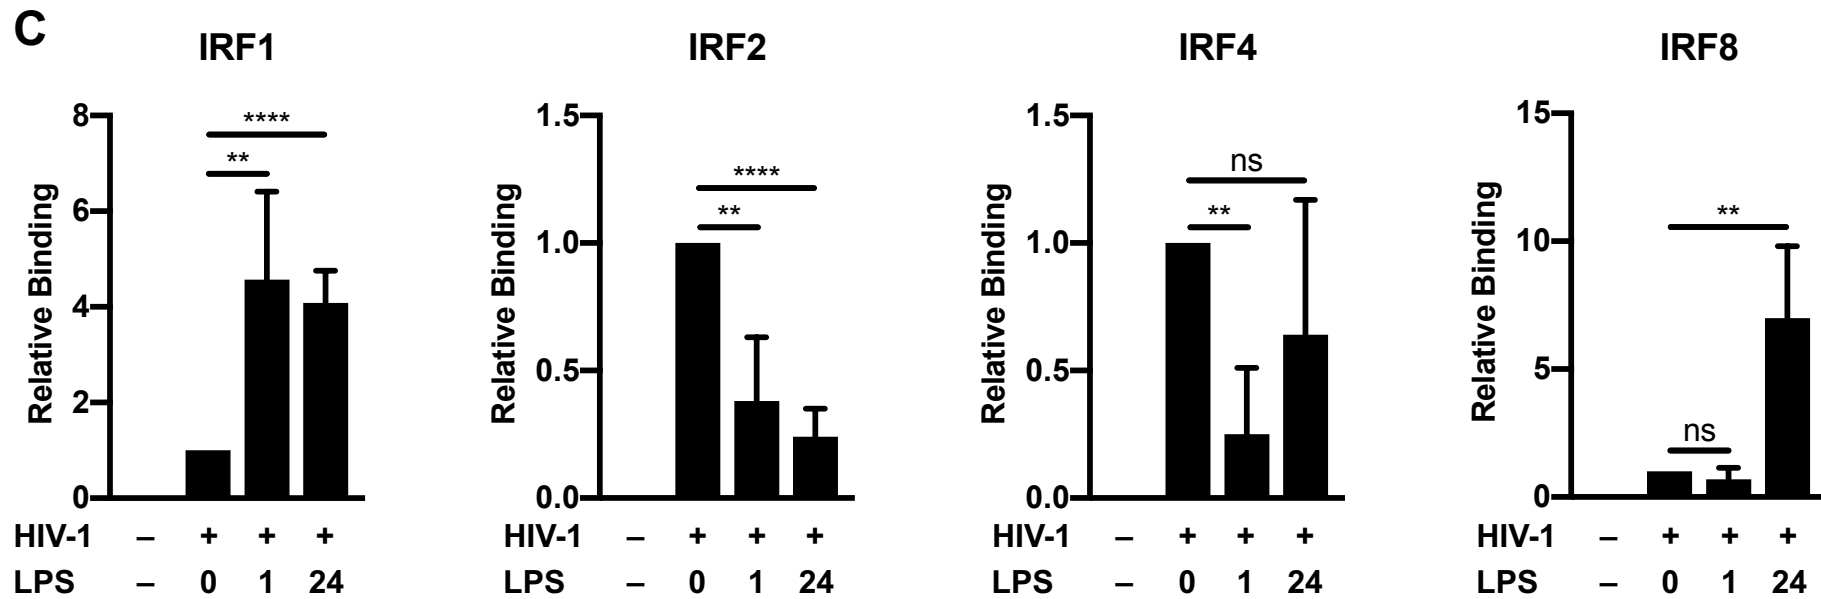

**D**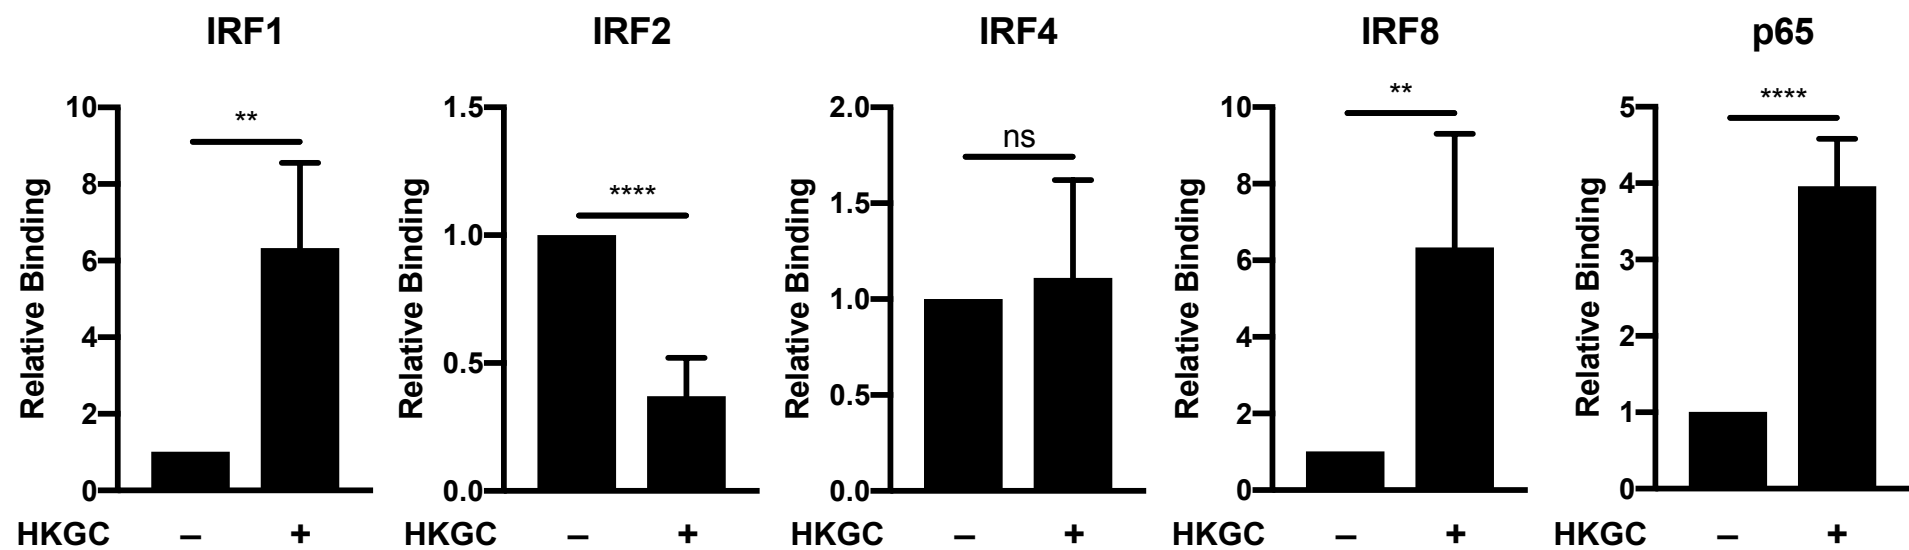**E**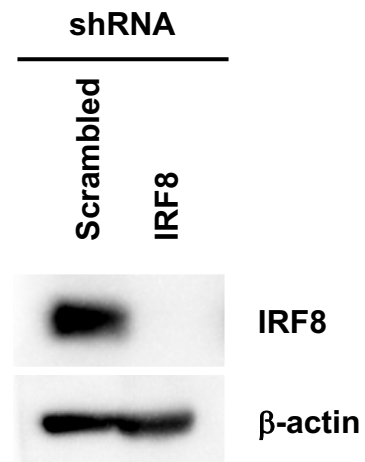**F**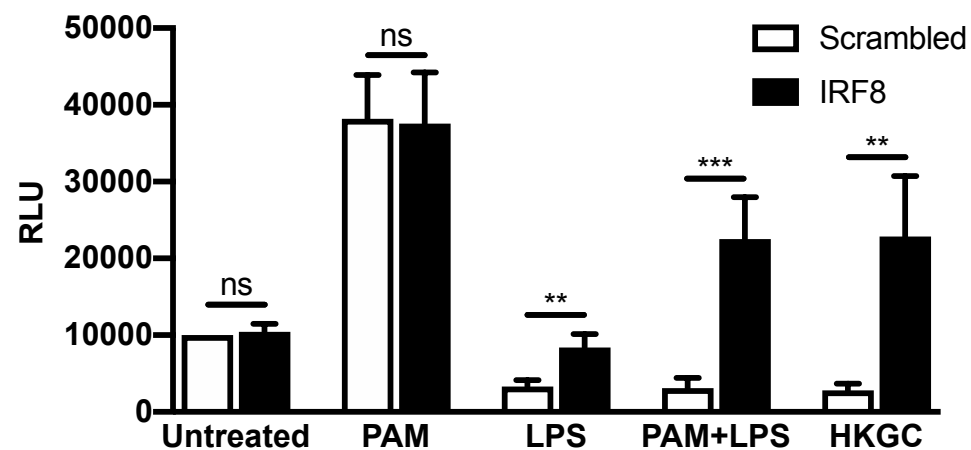**G**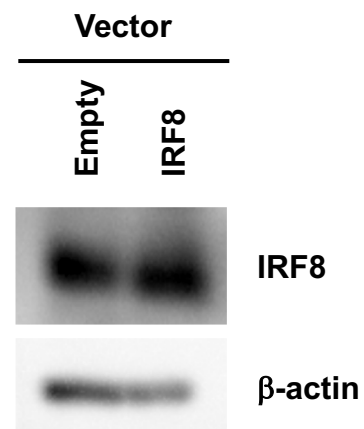**H**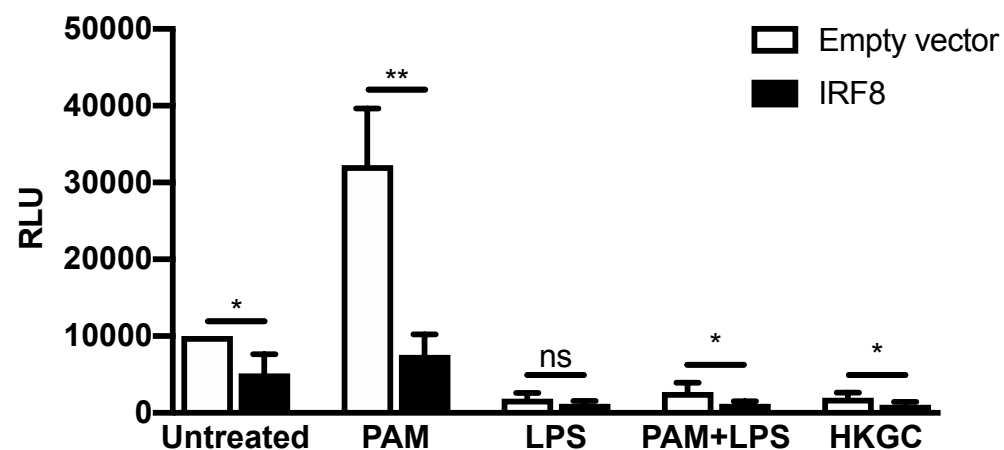

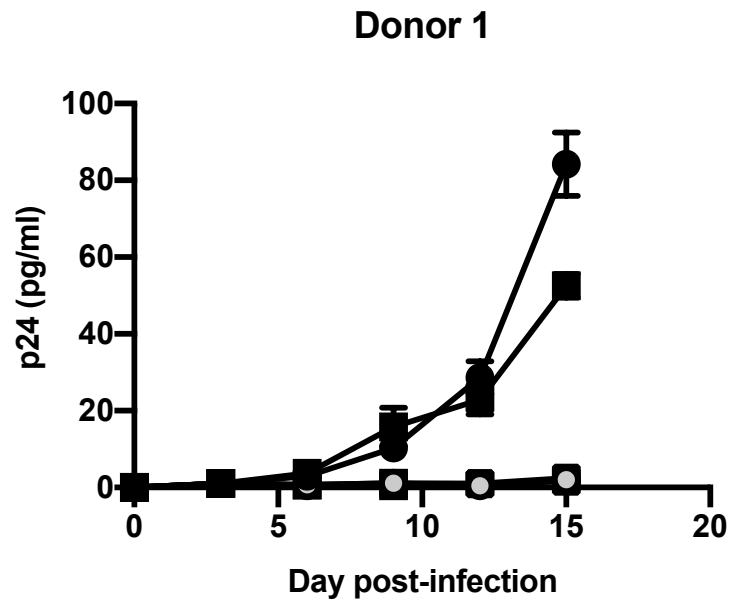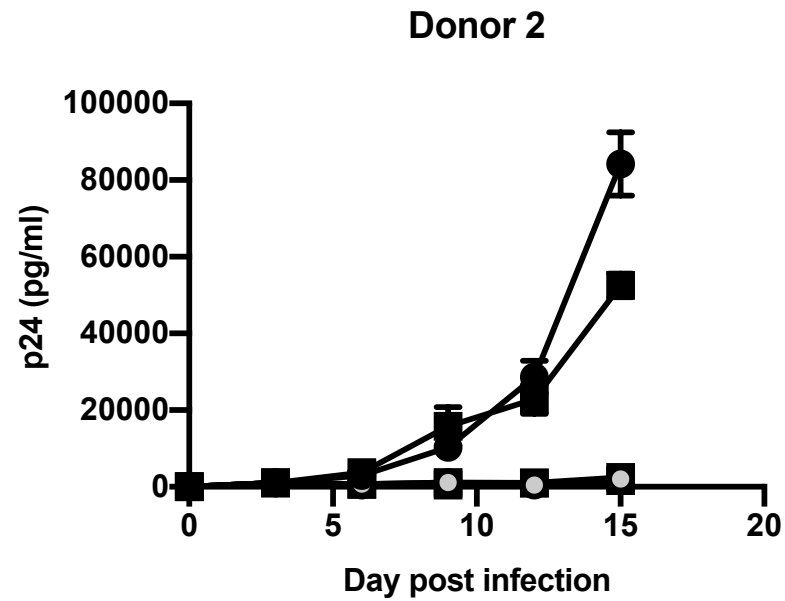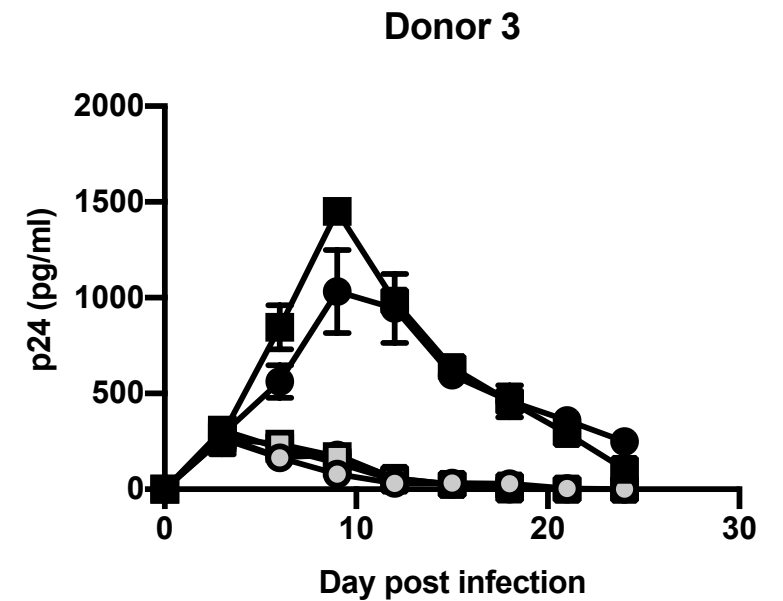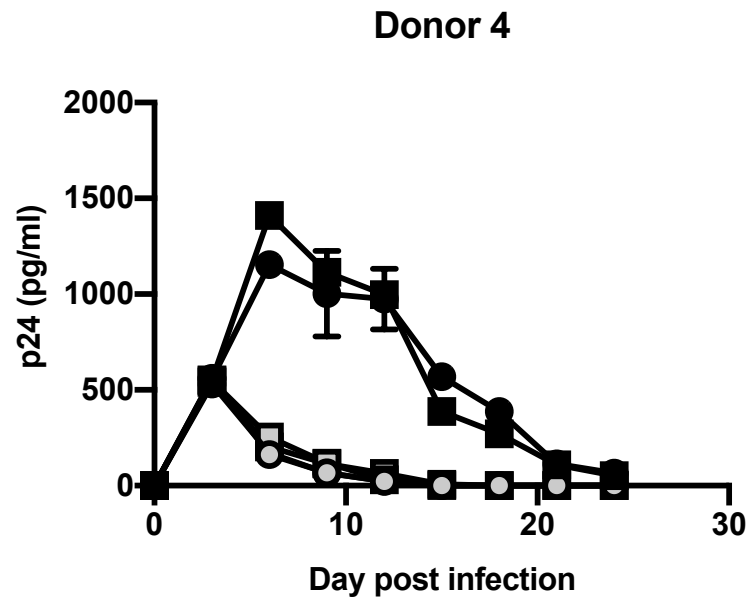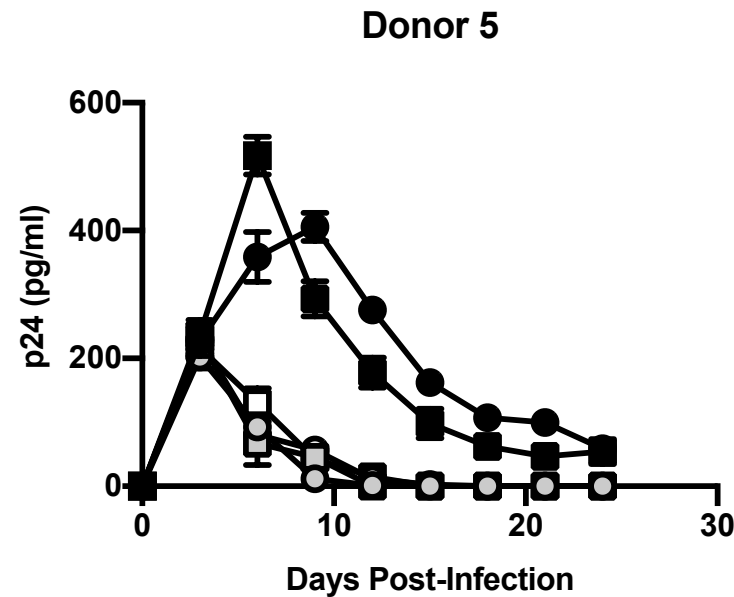

- Untreated
- PAM3CSK4
- LPS
- HKGC
- IFN-α
- IFN-β

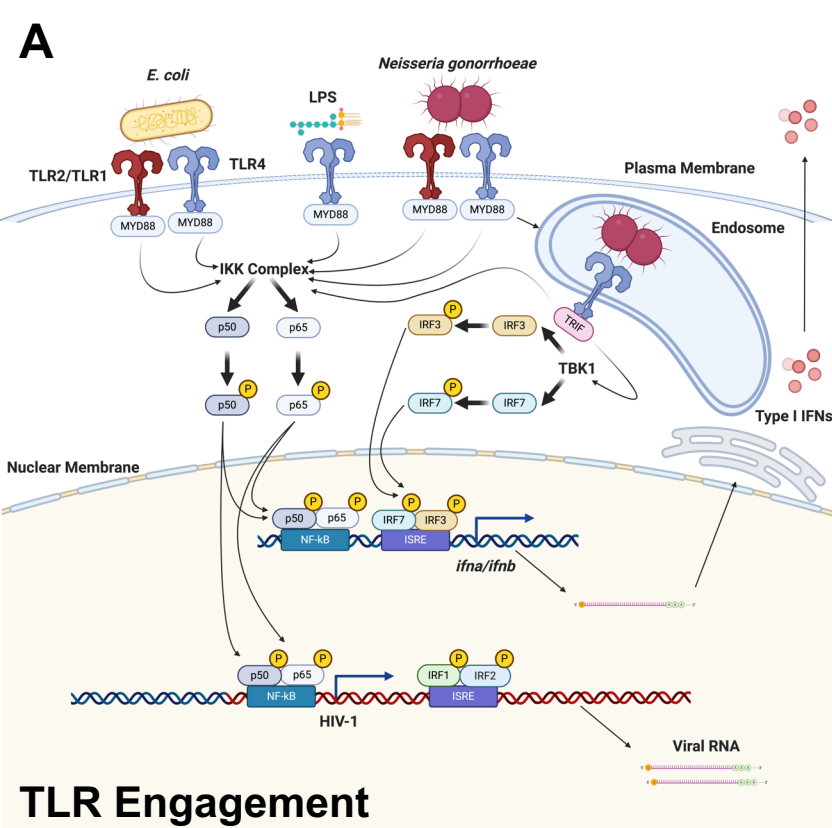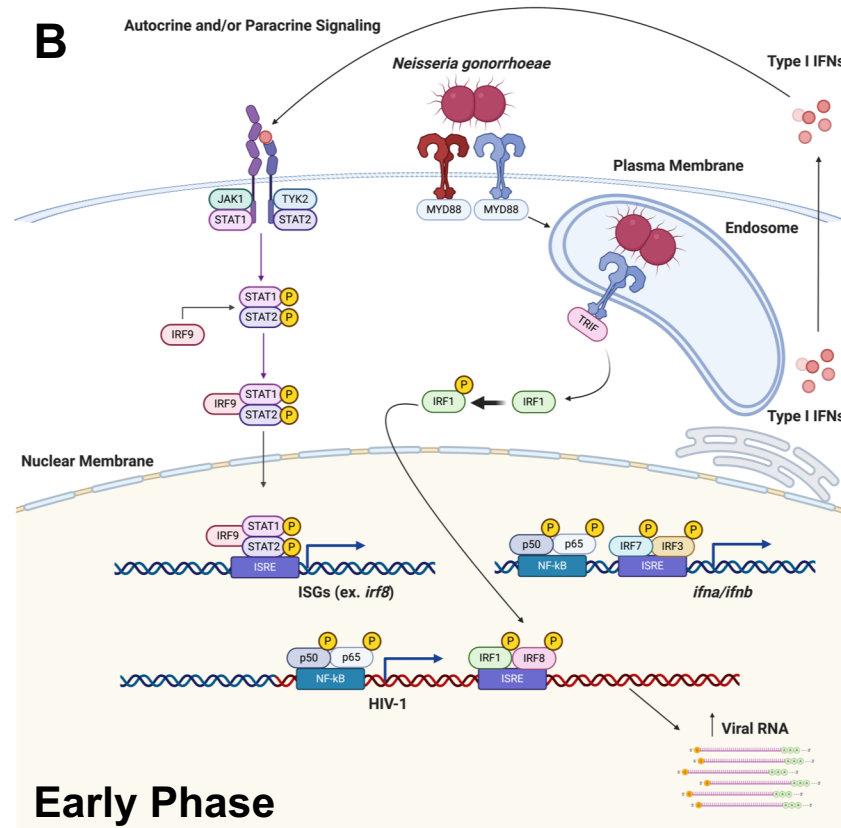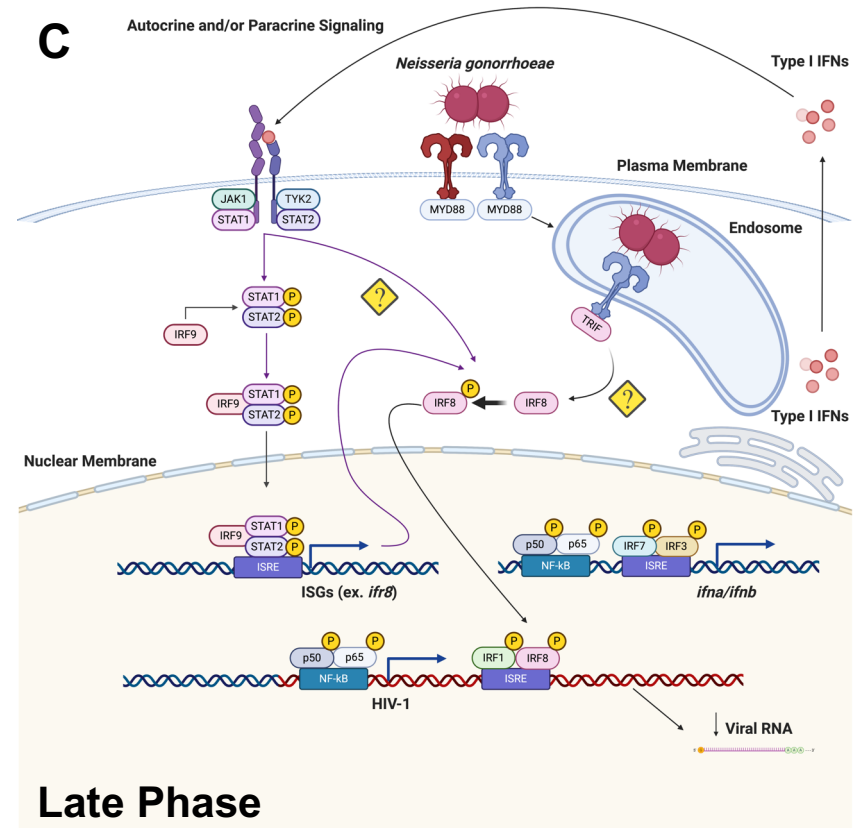



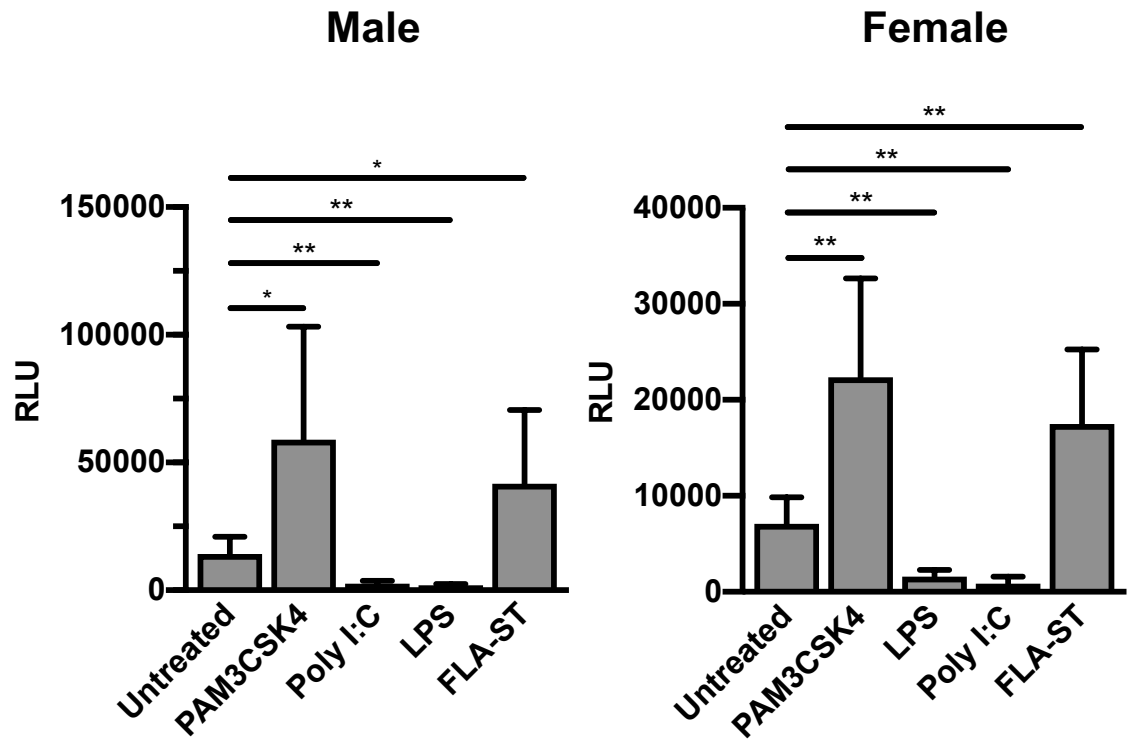

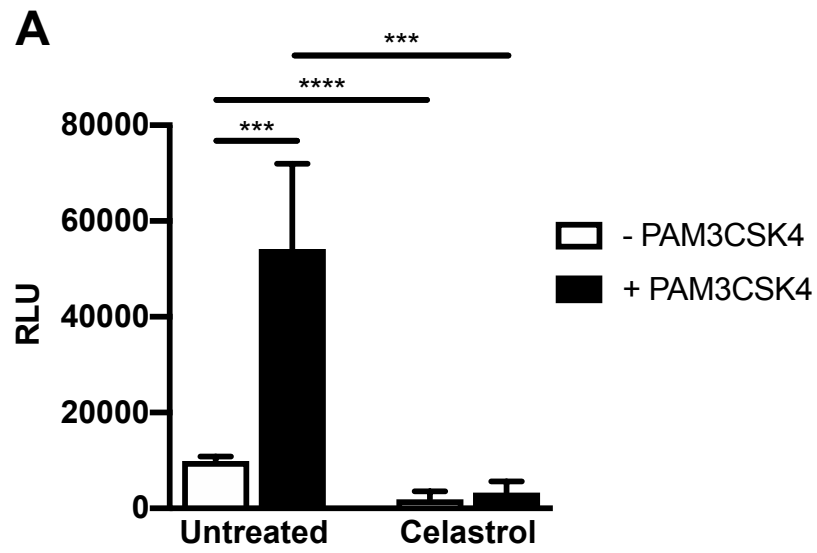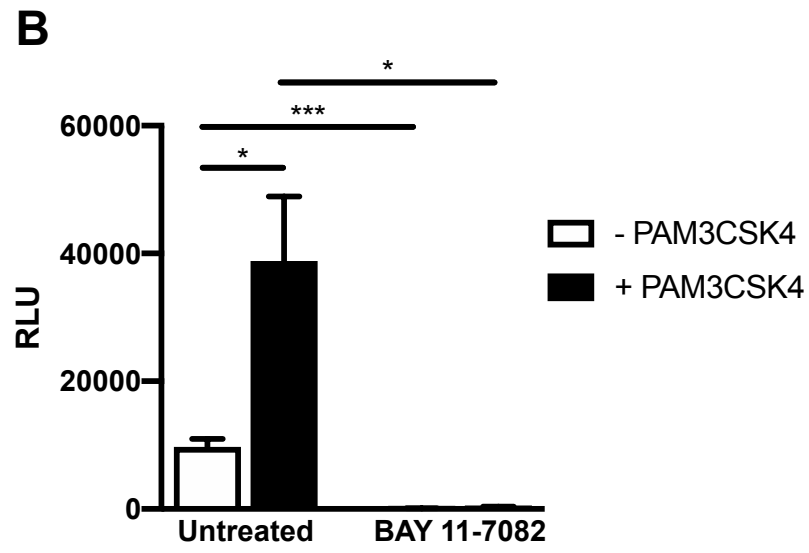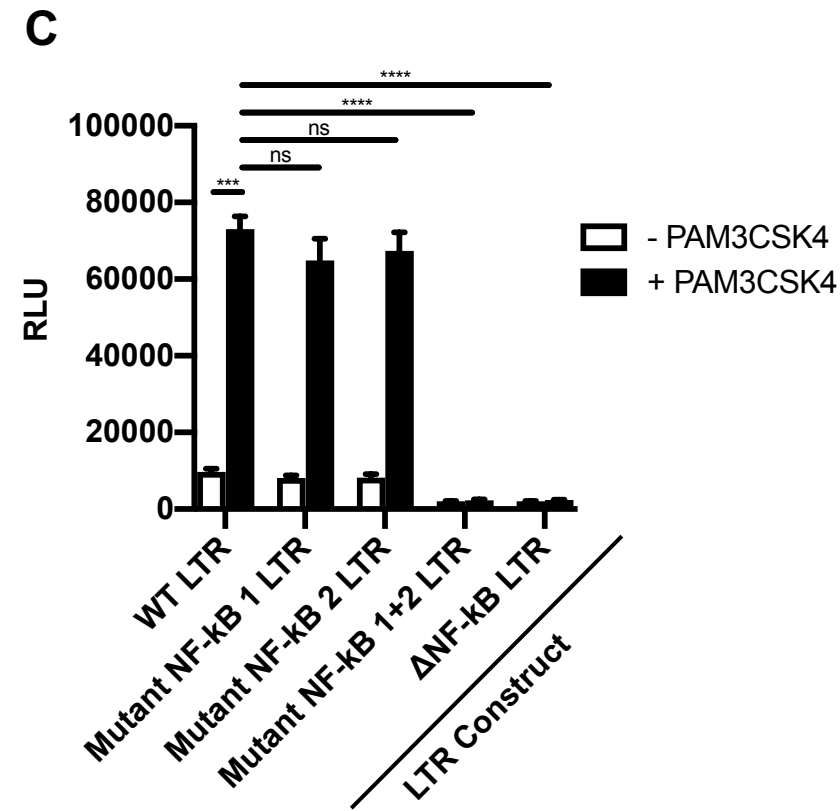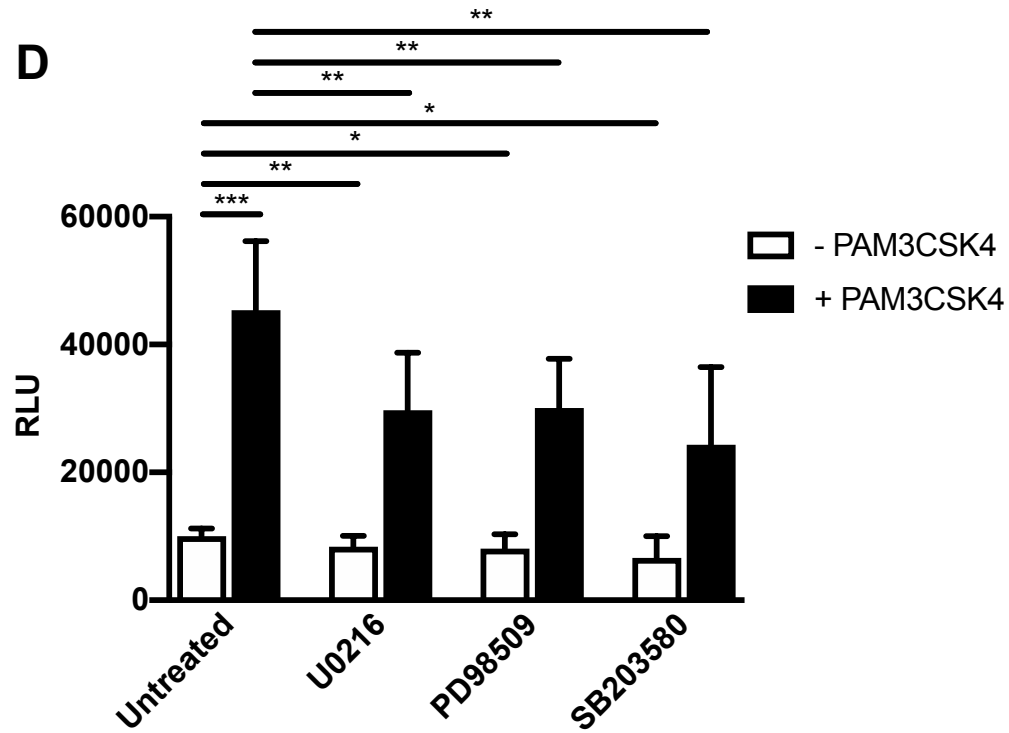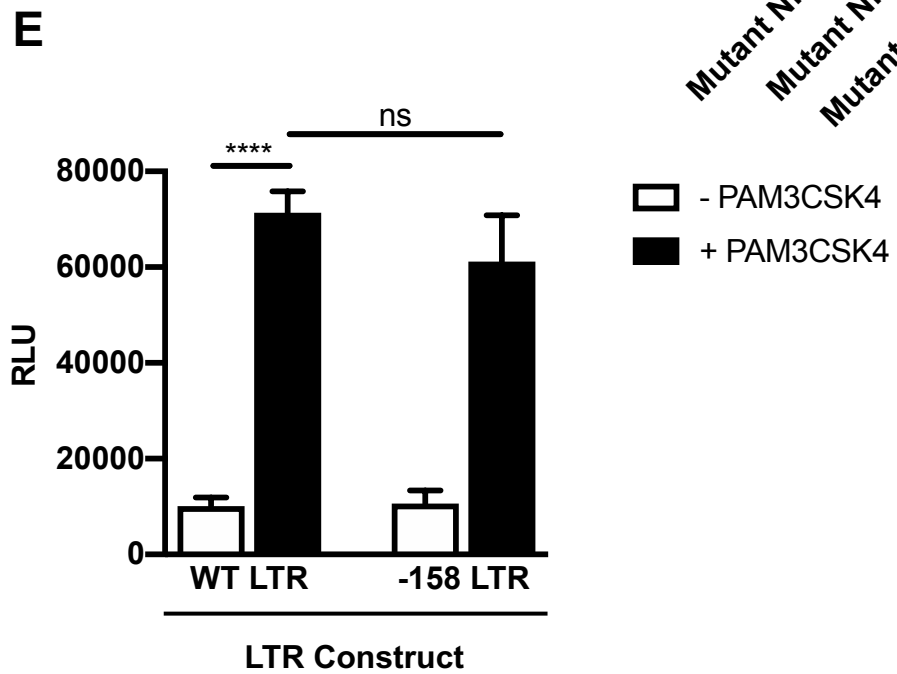

**A**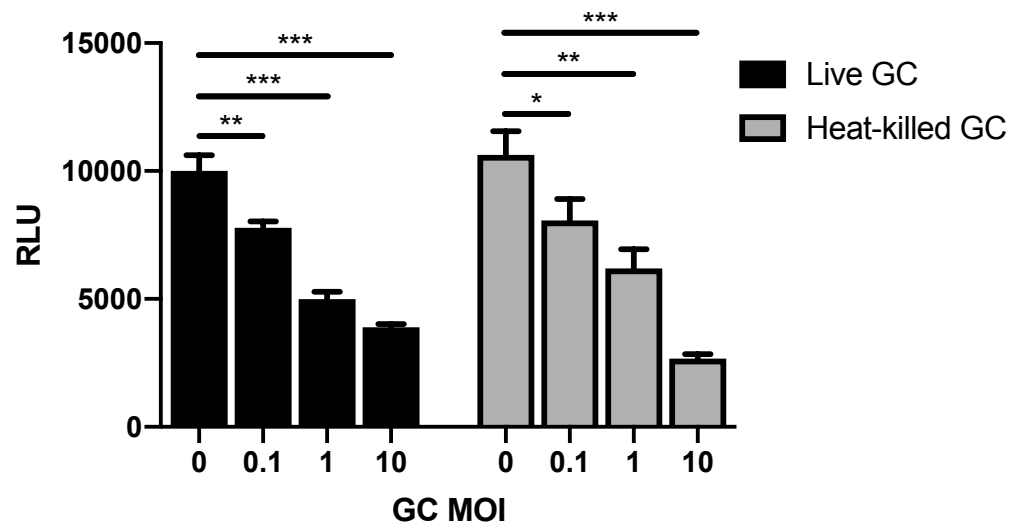**B**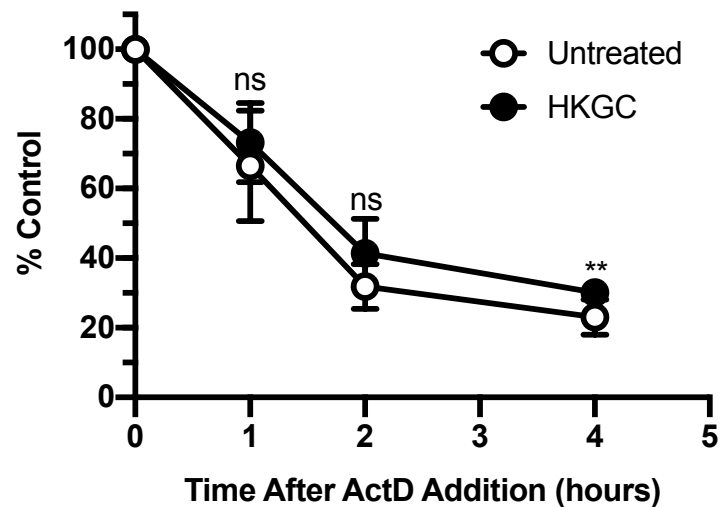**C**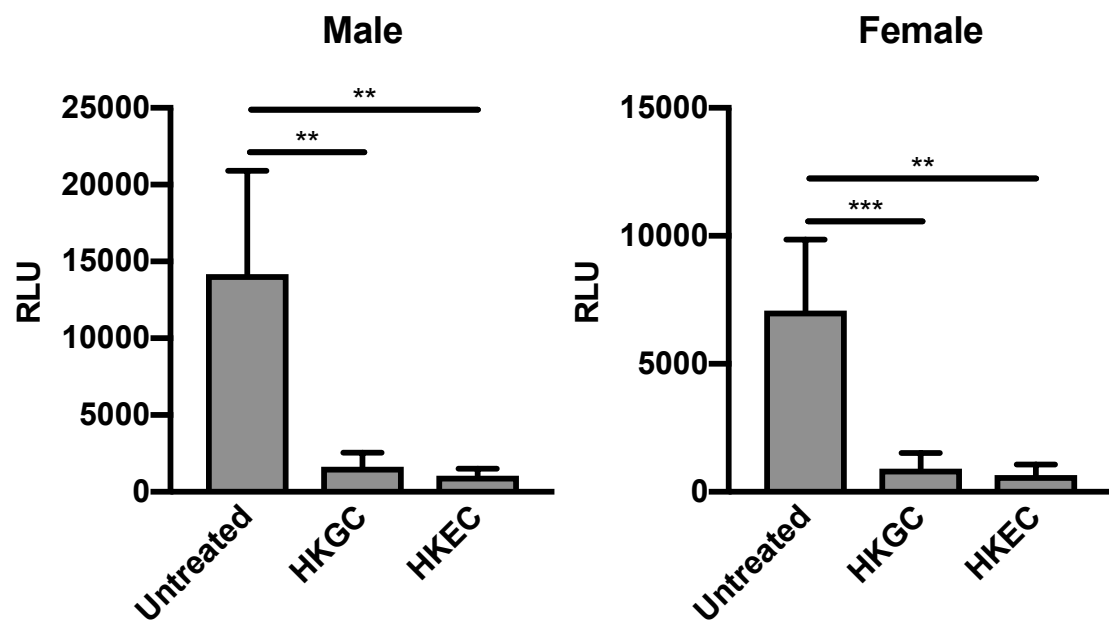

**A**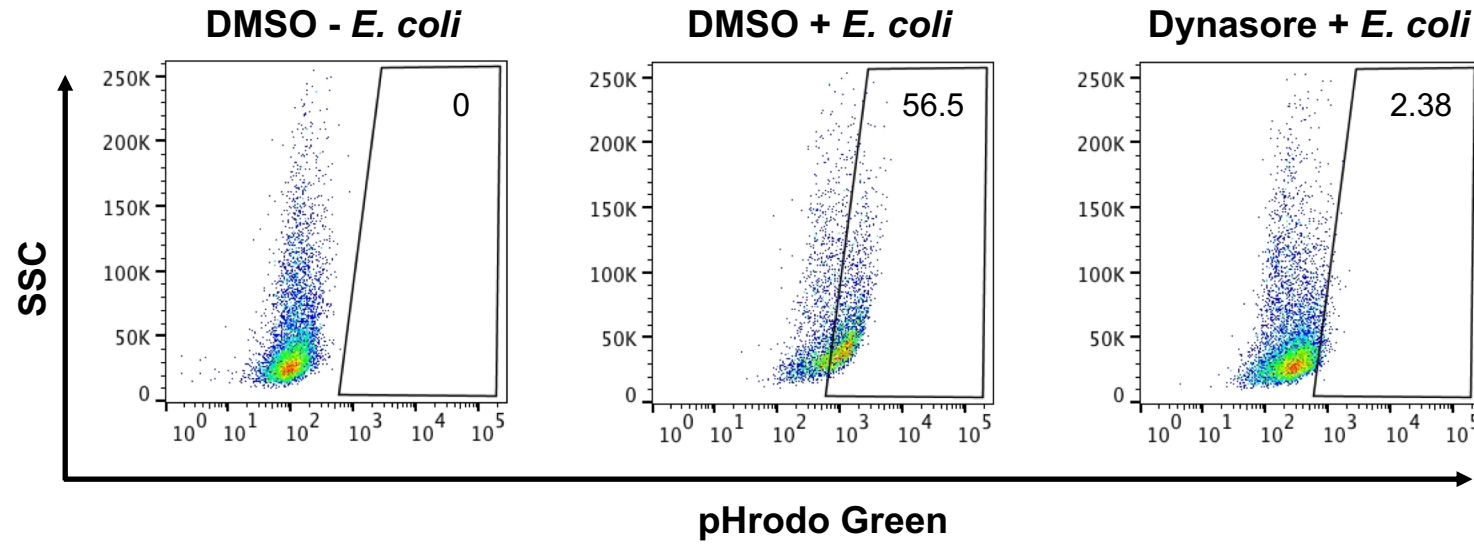**B**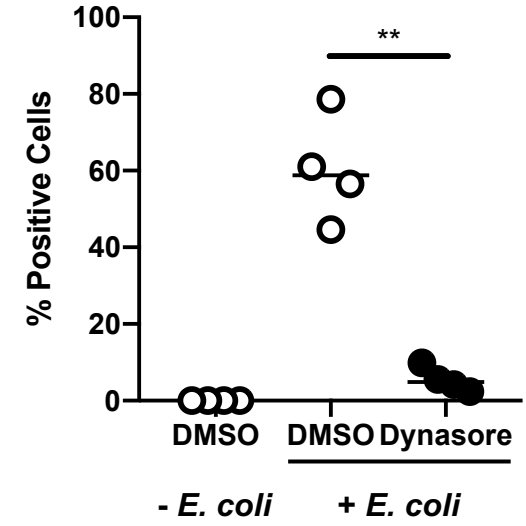

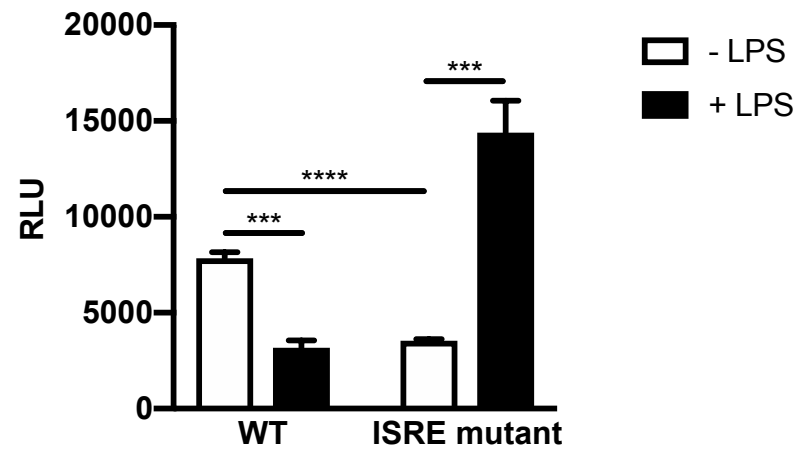

Source: https://www.biorxiv.org/content/10.1101/2020.05.18.103333v2.full.pdf
